# Supplementary material for: Identification of a receiver triplet state in the ultrafast intersystem crossing of carbonylpyrenes
Source: Royal Society of Chemistry journal article supplement (doi:10.1039/c9cp06857k), 2020-01-01
Supplement: c9cp06857k1.pdf [file c9cp06857k1.pdf]

**Supporting Information:**  
**Identification of receiver triplet state in  
the ultrafast intersystem crossing of  
carbonylpyrenes**

**Lekshmi R S, Gayathri B Kurup, Sivaranjana Reddy Vennapusa**  
*Indian Institute of Science Education and Research Thiruvananthapuram, Maruthamala P O,  
Vithura, Thiruvananthapuram 695551, India*  
E-mail: siva@iisertvm.ac.in

## Table of contents

**Fig. S1:** Optimized ground-state geometry of **P**, **AP2** and **AP4** at B3LYP/6-311G(d,p) level of theory.

**Table S1:** Details of vibrational frequencies of **P** at B3LYP/6-311G(d,p) level of theory.

**Table S2:** Details of vibrational frequencies of **AP2** at B3LYP/6-311G(d,p) level of theory.

**Table S3:** Details of vibrational frequencies of **AP4** at B3LYP/6-311G(d,p) level of theory.

**Table S4:** Singlet and triplet vertical excitation energies (VEE in eV) of **P**, **AP2** and **AP4** at B3LYP/6-311G(d,p) level of theory.

**Table S5:** Vibronic Hamiltonian matrices for the singlet and triplet manifold of **P**, **AP2** and **AP4**.

**Table S6:** Linear intrastate coupling parameters for singlet manifold of **P** at B3LYP/6-311G(d,p) level of theory.

**Table S7:** Linear interstate coupling parameters for singlet manifold of **P** at B3LYP/6-311G(d,p) level of theory.

**Table S8:** Linear intrastate coupling parameters for triplet manifold of **P** at B3LYP/6-311G(d,p) level of theory.

**Table S9:** Linear interstate coupling parameters for triplet manifold of **P** at B3LYP/6-311G(d,p) level of theory.

**Table S10:** Linear intrastate coupling parameters for singlet manifold of **AP2** at B3LYP/6-311G(d,p) level of theory.

**Table S11:** Linear interstate coupling parameters for singlet manifold of **AP2** at B3LYP/6-311G(d,p) level of theory.

**Table S12:** Linear intrastate coupling parameters for triplet manifold of **AP2** at B3LYP/6-311G(d,p) level of theory.

**Table S13:** Linear interstate coupling parameters for triplet manifold of **AP2** at B3LYP/6-311G(d,p) level of theory.

**Table S14:** Linear intrastate coupling parameters for singlet manifold of **AP4** at B3LYP/6-311G(d,p) level of theory.

**Table S15:** Linear interstate coupling parameters for singlet manifold of **AP4** at B3LYP/6-311G(d,p) level of theory.

**Table S16:** Linear intrastate coupling parameters for triplet manifold of **AP4** at B3LYP/6-311G(d,p) level of theory.

**Table S17:** Linear interstate coupling parameters for triplet manifold of **AP4** at B3LYP/6-311G(d,p) level of theory.

**Fig. S2:** Adiabatic potential energy profile for singlet manifold of **P**, **AP2** and **AP4** at B3LYP/6-311G(d,p) level of theory.

**Fig. S3:** Three dimensional potential energy surface of **AP2**.

**Fig. S4:** Three dimensional potential energy surface of **AP4**.

**Fig. S5:** Electronic population decay profiles of singlet manifold of **P**, **AP2** and **AP4**.

**Fig. S6:** Initial electronic population decay profile of S<sub>2</sub> state of **P**.

**Table S18:** MCTDH details of S<sub>1</sub>-S<sub>6</sub> and T<sub>1</sub>-T<sub>4</sub> / T<sub>1</sub>-T<sub>5</sub> dynamics of **P**, **AP2** and **AP4**.

**Fig. S1:** Ground state geometry of **P**, **AP2** and **AP4** optimized at B3LYP/6-311G(d,p) level of theory.

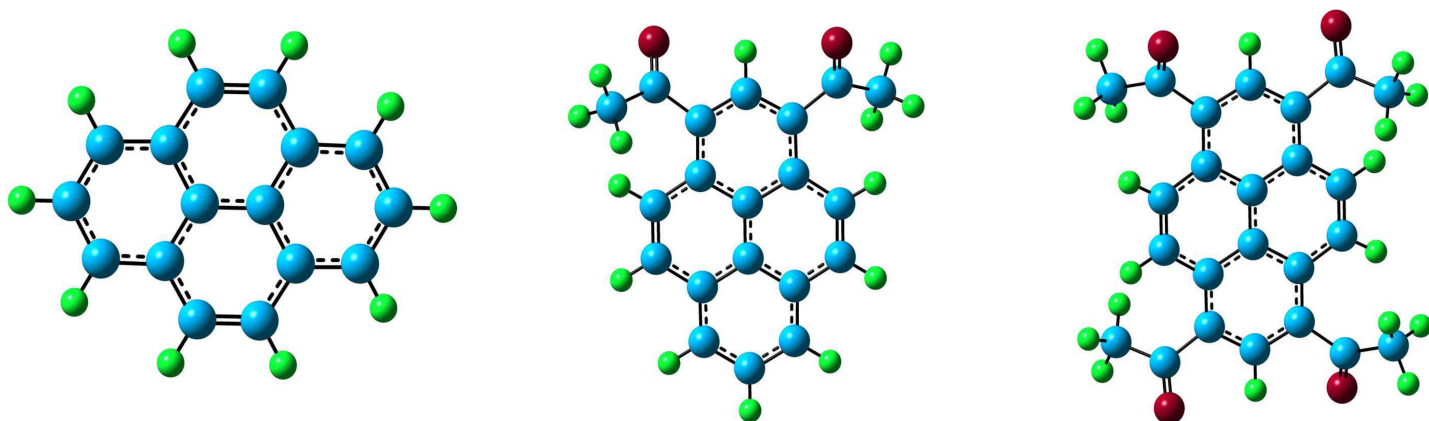

**Table S1:** Numbering, symmetry and harmonic frequency components of vibrational modes of **P** calculated at B3LYP/6-311G(d,p) level of theory.

| No.(Sym.)        | Freq (in $\text{cm}^{-1}$ ) | No.(Sym.)        | Freq (in $\text{cm}^{-1}$ ) | No.(Sym.)        | Freq (in $\text{cm}^{-1}$ ) |
|------------------|-----------------------------|------------------|-----------------------------|------------------|-----------------------------|
| $\nu_1$ (B3U)    | 98.4254                     | $\nu_{26}$ (B1U) | 834.4631                    | $\nu_{51}$ (AG)  | 1427.4565                   |
| $\nu_2$ (AU)     | 152.2882                    | $\nu_{27}$ (B2G) | 846.6147                    | $\nu_{52}$ (B3G) | 1434.2661                   |
| $\nu_3$ (B3U)    | 214.0022                    | $\nu_{28}$ (B3U) | 859.3325                    | $\nu_{53}$ (B2U) | 1457.8068                   |
| $\nu_4$ (B1G)    | 249.3383                    | $\nu_{29}$ (AU)  | 902.4360                    | $\nu_{54}$ (B1U) | 1459.4816                   |
| $\nu_5$ (B2G)    | 262.5502                    | $\nu_{30}$ (B1G) | 916.2475                    | $\nu_{55}$ (B1U) | 1483.2710                   |
| $\nu_6$ (B2U)    | 359.4307                    | $\nu_{31}$ (B2G) | 973.5891                    | $\nu_{56}$ (B2U) | 1515.5531                   |
| $\nu_7$ (AU)     | 402.0617                    | $\nu_{32}$ (AU)  | 979.8860                    | $\nu_{57}$ (B3G) | 1535.7080                   |
| $\nu_8$ (AG)     | 412.1204                    | $\nu_{33}$ (B2U) | 980.8016                    | $\nu_{58}$ (AG)  | 1596.4104                   |
| $\nu_9$ (B3G)    | 462.6067                    | $\nu_{34}$ (B3U) | 982.0027                    | $\nu_{59}$ (B3G) | 1626.0974                   |
| $\nu_{10}$ (B3U) | 500.4332                    | $\nu_{35}$ (B2G) | 990.9897                    | $\nu_{60}$ (B1U) | 1635.8261                   |
| $\nu_{11}$ (B1U) | 507.1292                    | $\nu_{36}$ (B1U) | 1014.9363                   | $\nu_{61}$ (B2U) | 1645.9468                   |
| $\nu_{12}$ (B3G) | 508.6963                    | $\nu_{37}$ (AG)  | 1091.2967                   | $\nu_{62}$ (AG)  | 1670.7893                   |
| $\nu_{13}$ (B2G) | 513.5979                    | $\nu_{38}$ (B1U) | 1113.9498                   | $\nu_{63}$ (B1U) | 3155.9250                   |
| $\nu_{14}$ (B1G) | 538.5187                    | $\nu_{39}$ (B3G) | 1127.0684                   | $\nu_{64}$ (B3G) | 3156.1961                   |
| $\nu_{15}$ (B2U) | 554.2838                    | $\nu_{40}$ (B2U) | 1165.3839                   | $\nu_{65}$ (AG)  | 3159.4343                   |
| $\nu_{16}$ (B2G) | 585.9834                    | $\nu_{41}$ (AG)  | 1168.0821                   | $\nu_{66}$ (B1U) | 3160.0565                   |
| $\nu_{17}$ (AG)  | 595.4396                    | $\nu_{42}$ (B3G) | 1198.3135                   | $\nu_{67}$ (B2U) | 3167.1859                   |
| $\nu_{18}$ (AU)  | 687.8000                    | $\nu_{43}$ (B2U) | 1204.3742                   | $\nu_{68}$ (B3G) | 3168.1101                   |
| $\nu_{19}$ (B1U) | 704.0640                    | $\nu_{44}$ (B2U) | 1232.1106                   | $\nu_{69}$ (AG)  | 3175.3078                   |
| $\nu_{20}$ (B3U) | 726.2456                    | $\nu_{45}$ (AG)  | 1262.6535                   | $\nu_{70}$ (B2U) | 3175.4013                   |
| $\nu_{21}$ (B3G) | 749.5580                    | $\nu_{46}$ (B3G) | 1264.1479                   | $\nu_{71}$ (B1U) | 3184.2757                   |
| $\nu_{22}$ (B3U) | 756.9113                    | $\nu_{47}$ (B1U) | 1268.3282                   | $\nu_{72}$ (AG)  | 3184.7420                   |
| $\nu_{23}$ (B2G) | 783.5288                    | $\nu_{48}$ (B2U) | 1342.7285                   |                  |                             |
| $\nu_{24}$ (B1G) | 814.6937                    | $\nu_{49}$ (AG)  | 1351.6222                   |                  |                             |
| $\nu_{25}$ (AG)  | 814.8641                    | $\nu_{50}$ (B3G) | 1399.9811                   |                  |                             |

**Table S2:** Numbering, symmetry and harmonic frequency components of vibrational modes of **AP2** calculated at B3LYP/6-311G(d,p) level of theory.

| No.(Sym.)      | Freq (in $\text{cm}^{-1}$ ) | No.(Sym.)      | Freq (in $\text{cm}^{-1}$ ) | No.(Sym.)       | Freq (in $\text{cm}^{-1}$ ) |
|----------------|-----------------------------|----------------|-----------------------------|-----------------|-----------------------------|
| $\nu_1$ (A)    | 48.3148                     | $\nu_{39}$ (B) | 831.0852                    | $\nu_{77}$ (B)  | 1483.3132                   |
| $\nu_2$ (B)    | 50.0960                     | $\nu_{40}$ (A) | 831.6901                    | $\nu_{78}$ (A)  | 1483.6930                   |
| $\nu_3$ (A)    | 61.9289                     | $\nu_{41}$ (B) | 842.9225                    | $\nu_{79}$ (A)  | 1490.0655                   |
| $\nu_4$ (B)    | 64.8000                     | $\nu_{42}$ (B) | 856.5355                    | $\nu_{80}$ (B)  | 1516.6380                   |
| $\nu_5$ (B)    | 125.4629                    | $\nu_{43}$ (A) | 866.5097                    | $\nu_{81}$ (B)  | 1540.1034                   |
| $\nu_6$ (A)    | 145.8265                    | $\nu_{44}$ (A) | 917.8238                    | $\nu_{82}$ (A)  | 1553.6222                   |
| $\nu_7$ (A)    | 168.1223                    | $\nu_{45}$ (B) | 951.6314                    | $\nu_{83}$ (B)  | 1615.6819                   |
| $\nu_8$ (B)    | 172.3892                    | $\nu_{46}$ (A) | 975.9206                    | $\nu_{84}$ (A)  | 1622.5586                   |
| $\nu_9$ (B)    | 174.8179                    | $\nu_{47}$ (B) | 980.9398                    | $\nu_{85}$ (B)  | 1645.7144                   |
| $\nu_{10}$ (A) | 188.2988                    | $\nu_{48}$ (A) | 987.0584                    | $\nu_{86}$ (A)  | 1665.3875                   |
| $\nu_{11}$ (B) | 229.9050                    | $\nu_{49}$ (B) | 992.9056                    | $\nu_{87}$ (B)  | 1751.7380                   |
| $\nu_{12}$ (A) | 266.8663                    | $\nu_{50}$ (B) | 999.1643                    | $\nu_{88}$ (A)  | 1755.4813                   |
| $\nu_{13}$ (B) | 270.7871                    | $\nu_{51}$ (B) | 1018.7982                   | $\nu_{89}$ (B)  | 3036.6912                   |
| $\nu_{14}$ (B) | 300.2219                    | $\nu_{52}$ (A) | 1034.3376                   | $\nu_{90}$ (A)  | 3036.7128                   |
| $\nu_{15}$ (A) | 309.2736                    | $\nu_{53}$ (B) | 1039.3946                   | $\nu_{91}$ (A)  | 3102.8402                   |
| $\nu_{16}$ (B) | 345.9302                    | $\nu_{54}$ (A) | 1060.1760                   | $\nu_{92}$ (B)  | 3102.8485                   |
| $\nu_{17}$ (A) | 365.4432                    | $\nu_{55}$ (A) | 1104.3420                   | $\nu_{93}$ (B)  | 3136.4318                   |
| $\nu_{18}$ (A) | 424.3614                    | $\nu_{56}$ (B) | 1133.0530                   | $\nu_{94}$ (A)  | 3136.4834                   |
| $\nu_{19}$ (B) | 433.6336                    | $\nu_{57}$ (A) | 1166.5286                   | $\nu_{95}$ (A)  | 3163.3564                   |
| $\nu_{20}$ (A) | 484.4566                    | $\nu_{58}$ (B) | 1185.6324                   | $\nu_{96}$ (B)  | 3167.2804                   |
| $\nu_{21}$ (B) | 490.8965                    | $\nu_{59}$ (A) | 1193.3055                   | $\nu_{97}$ (A)  | 3168.8131                   |
| $\nu_{22}$ (B) | 508.7036                    | $\nu_{60}$ (B) | 1199.9434                   | $\nu_{98}$ (B)  | 3171.7997                   |
| $\nu_{23}$ (B) | 511.9942                    | $\nu_{61}$ (B) | 1211.6843                   | $\nu_{99}$ (A)  | 3188.7418                   |
| $\nu_{24}$ (A) | 533.3391                    | $\nu_{62}$ (B) | 1242.8887                   | $\nu_{100}$ (A) | 3212.5049                   |
| $\nu_{25}$ (B) | 534.2843                    | $\nu_{63}$ (B) | 1254.9136                   | $\nu_{101}$ (B) | 3225.1673                   |
| $\nu_{26}$ (A) | 555.8849                    | $\nu_{64}$ (A) | 1269.1920                   | $\nu_{102}$ (A) | 3225.2893                   |
| $\nu_{27}$ (B) | 564.1284                    | $\nu_{65}$ (A) | 1277.3792                   |                 |                             |
| $\nu_{28}$ (A) | 590.8234                    | $\nu_{66}$ (B) | 1338.3130                   |                 |                             |
| $\nu_{29}$ (B) | 626.9759                    | $\nu_{67}$ (A) | 1366.6826                   |                 |                             |
| $\nu_{30}$ (A) | 647.1956                    | $\nu_{68}$ (A) | 1385.5320                   |                 |                             |
| $\nu_{31}$ (B) | 653.2707                    | $\nu_{69}$ (B) | 1386.2529                   |                 |                             |
| $\nu_{32}$ (A) | 663.0799                    | $\nu_{70}$ (A) | 1393.2832                   |                 |                             |
| $\nu_{33}$ (B) | 707.1562                    | $\nu_{71}$ (B) | 1395.0052                   |                 |                             |
| $\nu_{34}$ (A) | 707.7125                    | $\nu_{72}$ (B) | 1412.6582                   |                 |                             |
| $\nu_{35}$ (A) | 719.1865                    | $\nu_{73}$ (A) | 1443.8934                   |                 |                             |
| $\nu_{36}$ (B) | 733.7522                    | $\nu_{74}$ (B) | 1446.2475                   |                 |                             |
| $\nu_{37}$ (B) | 771.4456                    | $\nu_{75}$ (B) | 1474.7533                   |                 |                             |
| $\nu_{38}$ (A) | 827.2436                    | $\nu_{76}$ (A) | 1474.8586                   |                 |                             |

**Table S3:** Numbering, symmetry and harmonic frequency components of vibrational modes of **AP4** calculated at B3LYP/6-311G(d,p) level of theory.

| No.(Sym.)       | Freq (in $\text{cm}^{-1}$ ) | No.(Sym.)        | Freq (in $\text{cm}^{-1}$ ) | No.(Sym.)        | Freq (in $\text{cm}^{-1}$ ) |
|-----------------|-----------------------------|------------------|-----------------------------|------------------|-----------------------------|
| $\nu_1$ (AU)    | 30.2273                     | $\nu_{54}$ (AU)  | 832.5737                    | $\nu_{107}$ (AU) | 1589.6381                   |
| $\nu_2$ (BU)    | 40.3238                     | $\nu_{55}$ (AG)  | 837.5251                    | $\nu_{108}$ (BG) | 1606.0219                   |
| $\nu_3$ (AG)    | 52.1607                     | $\nu_{56}$ (BU)  | 843.5187                    | $\nu_{109}$ (BU) | 1646.8165                   |
| $\nu_4$ (BG)    | 52.3407                     | $\nu_{57}$ (BG)  | 885.9474                    | $\nu_{110}$ (AG) | 1659.2871                   |
| $\nu_5$ (BU)    | 54.4024                     | $\nu_{58}$ (AG)  | 929.0344                    | $\nu_{111}$ (BG) | 1755.7936                   |
| $\nu_6$ (AU)    | 56.7593                     | $\nu_{59}$ (BU)  | 946.8030                    | $\nu_{112}$ (BU) | 1755.9127                   |
| $\nu_7$ (AG)    | 78.8058                     | $\nu_{60}$ (BG)  | 963.3721                    | $\nu_{113}$ (AU) | 1757.5353                   |
| $\nu_8$ (BG)    | 103.1405                    | $\nu_{61}$ (AU)  | 976.2488                    | $\nu_{114}$ (AG) | 1761.0436                   |
| $\nu_9$ (BU)    | 105.8821                    | $\nu_{62}$ (AG)  | 985.6325                    | $\nu_{115}$ (BG) | 3037.7042                   |
| $\nu_{10}$ (AG) | 144.4761                    | $\nu_{63}$ (BG)  | 990.3140                    | $\nu_{116}$ (AU) | 3037.7242                   |
| $\nu_{11}$ (AU) | 151.4541                    | $\nu_{64}$ (AU)  | 992.0594                    | $\nu_{117}$ (BU) | 3037.7642                   |
| $\nu_{12}$ (BU) | 153.4361                    | $\nu_{65}$ (BU)  | 1000.1593                   | $\nu_{118}$ (AG) | 3037.7848                   |
| $\nu_{13}$ (AU) | 167.1370                    | $\nu_{66}$ (BG)  | 1007.3150                   | $\nu_{119}$ (AU) | 3103.5618                   |
| $\nu_{14}$ (BG) | 167.1537                    | $\nu_{67}$ (AU)  | 1034.1337                   | $\nu_{120}$ (BG) | 3103.5671                   |
| $\nu_{15}$ (AG) | 171.2940                    | $\nu_{68}$ (BU)  | 1034.5790                   | $\nu_{121}$ (AG) | 3103.6209                   |
| $\nu_{16}$ (BU) | 174.6969                    | $\nu_{69}$ (AG)  | 1036.0336                   | $\nu_{122}$ (BU) | 3103.6311                   |
| $\nu_{17}$ (BG) | 194.9366                    | $\nu_{70}$ (BU)  | 1038.2146                   | $\nu_{123}$ (BG) | 3137.3281                   |
| $\nu_{18}$ (AU) | 209.5500                    | $\nu_{71}$ (BG)  | 1039.3412                   | $\nu_{124}$ (AU) | 3137.3443                   |
| $\nu_{19}$ (BU) | 241.3192                    | $\nu_{72}$ (AU)  | 1080.1457                   | $\nu_{125}$ (BU) | 3137.3971                   |
| $\nu_{20}$ (AG) | 272.5689                    | $\nu_{73}$ (AG)  | 1133.4944                   | $\nu_{126}$ (AG) | 3137.4775                   |
| $\nu_{21}$ (BG) | 276.2921                    | $\nu_{74}$ (BG)  | 1138.6556                   | $\nu_{127}$ (AU) | 3212.9428                   |
| $\nu_{22}$ (AG) | 276.4776                    | $\nu_{75}$ (BU)  | 1200.7678                   | $\nu_{128}$ (AG) | 3213.0611                   |
| $\nu_{23}$ (BG) | 304.7693                    | $\nu_{76}$ (BG)  | 1203.0145                   | $\nu_{129}$ (BG) | 3213.4032                   |
| $\nu_{24}$ (BU) | 317.3768                    | $\nu_{77}$ (AG)  | 1207.4304                   | $\nu_{130}$ (AU) | 3213.4431                   |
| $\nu_{25}$ (AU) | 330.4686                    | $\nu_{78}$ (AU)  | 1214.4213                   | $\nu_{131}$ (BU) | 3229.9576                   |
| $\nu_{26}$ (BU) | 348.0975                    | $\nu_{79}$ (BU)  | 1216.2391                   | $\nu_{132}$ (BU) | 3230.0883                   |
| $\nu_{27}$ (AU) | 379.6583                    | $\nu_{80}$ (BU)  | 1245.4556                   |                  |                             |
| $\nu_{28}$ (BG) | 380.3656                    | $\nu_{81}$ (BG)  | 1249.1632                   |                  |                             |
| $\nu_{29}$ (AG) | 388.7587                    | $\nu_{82}$ (AG)  | 1275.8627                   |                  |                             |
| $\nu_{30}$ (BU) | 462.9933                    | $\nu_{83}$ (AU)  | 1284.1516                   |                  |                             |
| $\nu_{31}$ (AU) | 491.5166                    | $\nu_{84}$ (BU)  | 1337.1036                   |                  |                             |
| $\nu_{32}$ (AG) | 499.8981                    | $\nu_{85}$ (AG)  | 1369.1968                   |                  |                             |
| $\nu_{33}$ (BG) | 509.3557                    | $\nu_{86}$ (AG)  | 1385.4120                   |                  |                             |
| $\nu_{34}$ (BG) | 525.6432                    | $\nu_{87}$ (BG)  | 1385.9199                   |                  |                             |
| $\nu_{35}$ (BU) | 531.0913                    | $\nu_{88}$ (AU)  | 1387.3990                   |                  |                             |
| $\nu_{36}$ (BG) | 542.9742                    | $\nu_{89}$ (BG)  | 1387.4350                   |                  |                             |
| $\nu_{37}$ (AG) | 554.4809                    | $\nu_{90}$ (BU)  | 1388.4439                   |                  |                             |
| $\nu_{38}$ (AU) | 574.2593                    | $\nu_{91}$ (AG)  | 1389.8790                   |                  |                             |
| $\nu_{39}$ (BG) | 589.2751                    | $\nu_{92}$ (BU)  | 1394.1417                   |                  |                             |
| $\nu_{40}$ (AG) | 591.2928                    | $\nu_{93}$ (AU)  | 1410.5284                   |                  |                             |
| $\nu_{41}$ (BU) | 612.3613                    | $\nu_{94}$ (BG)  | 1431.9675                   |                  |                             |
| $\nu_{42}$ (AU) | 616.1313                    | $\nu_{95}$ (BG)  | 1473.9667                   |                  |                             |
| $\nu_{43}$ (AU) | 655.9481                    | $\nu_{96}$ (AU)  | 1474.2320                   |                  |                             |
| $\nu_{44}$ (BU) | 658.9983                    | $\nu_{97}$ (BU)  | 1475.3306                   |                  |                             |
| $\nu_{45}$ (AG) | 669.7171                    | $\nu_{98}$ (AG)  | 1475.6384                   |                  |                             |
| $\nu_{46}$ (BG) | 679.2529                    | $\nu_{99}$ (AU)  | 1483.8964                   |                  |                             |
| $\nu_{47}$ (AG) | 680.3140                    | $\nu_{100}$ (BG) | 1484.1027                   |                  |                             |
| $\nu_{48}$ (AU) | 710.6873                    | $\nu_{101}$ (BU) | 1484.1510                   |                  |                             |
| $\nu_{49}$ (BG) | 712.0282                    | $\nu_{102}$ (AG) | 1485.1042                   |                  |                             |
| $\nu_{50}$ (AU) | 733.4121                    | $\nu_{103}$ (AU) | 1492.7456                   |                  |                             |
| $\nu_{51}$ (BU) | 733.8512                    | $\nu_{104}$ (BU) | 1522.8208                   |                  |                             |
| $\nu_{52}$ (BU) | 760.8984                    | $\nu_{105}$ (AG) | 1533.0119                   |                  |                             |
| $\nu_{53}$ (BG) | 817.1631                    | $\nu_{106}$ (BG) | 1538.7536                   |                  |                             |

**Table S4:** VEE (in eV) of **P**, **AP2** & **AP4** obtained at B3LYP/6-311G(d,p) level of theory. Oscillator strength shown in paranthesis.

|                | <b>P</b>        | <b>AP2</b>      | <b>AP4</b>      |                | <b>P</b> | <b>AP2</b> | <b>AP4</b> |
|----------------|-----------------|-----------------|-----------------|----------------|----------|------------|------------|
| S <sub>1</sub> | 3.6924 (0.2537) | 3.2633 (0.3646) | 3.0198 (0.4607) | T <sub>1</sub> | 2.1580   | 1.9434     | 1.7892     |
| S <sub>2</sub> | 3.7576 (0.0002) | 3.3499 (0.0106) | 3.0899 (0.0235) | T <sub>2</sub> | 3.4459   | 2.9345     | 2.6941     |
| S <sub>3</sub> | 4.3744 (0.0000) | 3.5743 (0.0181) | 3.2234 (0.0000) | T <sub>3</sub> | 3.5684   | 3.1456     | 2.8945     |
| S <sub>4</sub> | 4.6016 (0.2648) | 3.5784 (0.0014) | 3.3917 (0.0000) | T <sub>4</sub> | 3.5920   | 3.2336     | 3.0049     |
| S <sub>5</sub> | 4.6249 (0.0000) | 4.0956 (0.0470) | 3.3945 (0.0479) | T <sub>5</sub> | 3.8952   | 3.4517     | 3.0397     |
| S <sub>6</sub> | 5.0539 (0.0000) | 4.2718 (0.1104) | 3.4398 (0.0113) | T <sub>6</sub> | 3.8969   | 3.5152     | 3.0921     |

**Table S5:** Vibronic Hamiltonian matrices ( $H'$ ) constructed for the singlet and triplet manifold of **P**, **AP2** & **AP4**.

**Singlets:**

**P, AP2 & AP4:**

$$H' = \begin{pmatrix} E_{S_1}^{(0)} + \sum_t \kappa_t^{(S_1)} Q_t & \sum_{nt} \lambda_{nt}^{(12)} Q_{nt} & \sum_{nt} \lambda_{nt}^{(13)} Q_{nt} & \sum_{nt} \lambda_{nt}^{(14)} Q_{nt} & \sum_{nt} \lambda_{nt}^{(15)} Q_{nt} & \sum_{nt} \lambda_{nt}^{(16)} Q_{nt} \\ \sum_{nt} \lambda_{nt}^{(21)} Q_{nt} & E_{S_2}^{(0)} + \sum_t \kappa_t^{(S_2)} Q_t & \sum_{nt} \lambda_{nt}^{(23)} Q_{nt} & \sum_{nt} \lambda_{nt}^{(24)} Q_{nt} & \sum_{nt} \lambda_{nt}^{(25)} Q_{nt} & \sum_{nt} \lambda_{nt}^{(26)} Q_{nt} \\ \sum_{nt} \lambda_{nt}^{(31)} Q_{nt} & \sum_{nt} \lambda_{nt}^{(32)} Q_{nt} & E_{S_3}^{(0)} + \sum_t \kappa_t^{(S_3)} Q_t & \sum_{nt} \lambda_{nt}^{(34)} Q_{nt} & \sum_{nt} \lambda_{nt}^{(35)} Q_{nt} & \sum_{nt} \lambda_{nt}^{(36)} Q_{nt} \\ \sum_{nt} \lambda_{nt}^{(41)} Q_{nt} & \sum_{nt} \lambda_{nt}^{(42)} Q_{nt} & \sum_{nt} \lambda_{nt}^{(43)} Q_{nt} & E_{S_4}^{(0)} + \sum_t \kappa_t^{(S_4)} Q_t & \sum_{nt} \lambda_{nt}^{(45)} Q_{nt} & \sum_{nt} \lambda_{nt}^{(46)} Q_{nt} \\ \sum_{nt} \lambda_{nt}^{(51)} Q_{nt} & \sum_{nt} \lambda_{nt}^{(52)} Q_{nt} & \sum_{nt} \lambda_{nt}^{(53)} Q_{nt} & \sum_{nt} \lambda_{nt}^{(54)} Q_{nt} & E_{S_5}^{(0)} + \sum_t \kappa_t^{(S_5)} Q_t & \sum_{nt} \lambda_{nt}^{(56)} Q_{nt} \\ \sum_{nt} \lambda_{nt}^{(61)} Q_{nt} & \sum_{nt} \lambda_{nt}^{(62)} Q_{nt} & \sum_{nt} \lambda_{nt}^{(63)} Q_{nt} & \sum_{nt} \lambda_{nt}^{(64)} Q_{nt} & \sum_{nt} \lambda_{nt}^{(65)} Q_{nt} & E_{S_6}^{(0)} + \sum_t \kappa_t^{(S_6)} Q_t \end{pmatrix}$$

**Triples:**

**P & AP2:**

$$H' = \begin{pmatrix} E_{T_1}^{(0)} + \sum_t \kappa_t^{(T_1)} Q_t & \sum_{nt} \lambda_{nt}^{(12)} Q_{nt} & \sum_{nt} \lambda_{nt}^{(13)} Q_{nt} & \sum_{nt} \lambda_{nt}^{(14)} Q_{nt} \\ \sum_{nt} \lambda_{nt}^{(21)} Q_{nt} & E_{T_2}^{(0)} + \sum_t \kappa_t^{(T_2)} Q_t & \sum_{nt} \lambda_{nt}^{(23)} Q_{nt} & \sum_{nt} \lambda_{nt}^{(24)} Q_{nt} \\ \sum_{nt} \lambda_{nt}^{(31)} Q_{nt} & \sum_{nt} \lambda_{nt}^{(32)} Q_{nt} & E_{T_3}^{(0)} + \sum_t \kappa_t^{(T_3)} Q_t & \sum_{nt} \lambda_{nt}^{(34)} Q_{nt} \\ \sum_{nt} \lambda_{nt}^{(41)} Q_{nt} & \sum_{nt} \lambda_{nt}^{(42)} Q_{nt} & \sum_{nt} \lambda_{nt}^{(43)} Q_{nt} & E_{T_4}^{(0)} + \sum_t \kappa_t^{(T_4)} Q_t \end{pmatrix}$$

**AP4:**

$$H' = \begin{pmatrix} E_{T_1}^{(0)} + \sum_t \kappa_t^{(T_1)} Q_t & \sum_{nt} \lambda_{nt}^{(12)} Q_{nt} & \sum_{nt} \lambda_{nt}^{(13)} Q_{nt} & \sum_{nt} \lambda_{nt}^{(14)} Q_{nt} & \sum_{nt} \lambda_{nt}^{(15)} Q_{nt} \\ \sum_{nt} \lambda_{nt}^{(21)} Q_{nt} & E_{T_2}^{(0)} + \sum_t \kappa_t^{(T_2)} Q_t & \sum_{nt} \lambda_{nt}^{(23)} Q_{nt} & \sum_{nt} \lambda_{nt}^{(24)} Q_{nt} & \sum_{nt} \lambda_{nt}^{(25)} Q_{nt} \\ \sum_{nt} \lambda_{nt}^{(31)} Q_{nt} & \sum_{nt} \lambda_{nt}^{(32)} Q_{nt} & E_{T_3}^{(0)} + \sum_t \kappa_t^{(T_3)} Q_t & \sum_{nt} \lambda_{nt}^{(34)} Q_{nt} & \sum_{nt} \lambda_{nt}^{(35)} Q_{nt} \\ \sum_{nt} \lambda_{nt}^{(41)} Q_{nt} & \sum_{nt} \lambda_{nt}^{(42)} Q_{nt} & \sum_{nt} \lambda_{nt}^{(43)} Q_{nt} & E_{T_4}^{(0)} + \sum_t \kappa_t^{(T_4)} Q_t & \sum_{nt} \lambda_{nt}^{(45)} Q_{nt} \\ \sum_{nt} \lambda_{nt}^{(51)} Q_{nt} & \sum_{nt} \lambda_{nt}^{(52)} Q_{nt} & \sum_{nt} \lambda_{nt}^{(53)} Q_{nt} & \sum_{nt} \lambda_{nt}^{(54)} Q_{nt} & E_{T_5}^{(0)} + \sum_t \kappa_t^{(T_5)} Q_t \end{pmatrix}$$

**Table S6:** Linear intrastate coupling parameters ( $\kappa$ ) for singlet electronic states of **P** obtained at B3LYP/6-311G(d,p) level of theory. Coupling strength ( $\kappa^2/2\omega^2$ ) obtained for each vibrational mode is shown in paranthesis.

| AG mode<br>(Freq, eV) | $\kappa^{S_1}$  | $\kappa^{S_2}$  | $\kappa^{S_3}$   | $\kappa^{S_4}$  | $\kappa^{S_5}$  | $\kappa^{S_6}$  |
|-----------------------|-----------------|-----------------|------------------|-----------------|-----------------|-----------------|
| $\nu_8(0.0511)$       | -0.0363(0.2523) | -0.0108(0.0223) | -0.0226(0.0978)  | -0.0165(0.0524) | -0.0902(1.5592) | -0.0261(0.1305) |
| $\nu_{17}(0.0738)$    | -0.0151(0.0209) | -0.0359(0.1183) | -0.0163(0.0245)  | -0.0396(0.1442) | -0.0310(0.0885) | -0.0434(0.1726) |
| $\nu_{25}(0.1010)$    | -0.0088(0.0038) | -0.0029(0.0004) | -0.0006(0.0001)  | -0.0051(0.0013) | -0.0771(0.2914) | 0.0203(0.0202)  |
| $\nu_{37}(0.1353)$    | -0.0165(0.0074) | -0.0475(0.0616) | -0.0130(0.0046)  | -0.0450(0.0554) | 0.0169(0.0078)  | -0.0242(0.0160) |
| $\nu_{41}(0.1448)$    | -0.0333(0.0264) | 0.0115(0.0032)  | -0.0735 (0.1289) | -0.0007(0.0001) | -0.0434(0.0450) | -0.0448(0.0478) |
| $\nu_{45}(0.1565)$    | 0.1123(0.2575)  | 0.0883(0.1592)  | 0.0453(0.0420)   | 0.0640(0.0837)  | 0.0501(0.0513)  | 0.0791(0.1277)  |
| $\nu_{49}(0.1676)$    | -0.0086(0.0013) | -0.0234(0.0097) | -0.0512(0.0467)  | -0.0185(0.0061) | -0.1039(0.1923) | 0.0598(0.0637)  |
| $\nu_{51}(0.1770)$    | -0.1037(0.1716) | -0.1212(0.2344) | -0.0084(0.0011)  | -0.0880(0.1235) | -0.0309(0.0152) | -0.0248(0.0098) |
| $\nu_{58}(0.1979)$    | -0.0068(0.0006) | 0.0559(0.0399)  | 0.0576(0.0424)   | 0.0534(0.0364)  | 0.0138(0.0024)  | -0.0367(0.0172) |
| $\nu_{62}(0.2072)$    | 0.1486(0.2572)  | -0.0127(0.0019) | 0.2721(0.8625)   | 0.0101(0.0012)  | 0.2202(0.5645)  | 0.1334(0.2074)  |
| $\nu_{65}(0.3917)$    | -0.0054(0.0001) | 0.0009(0.0001)  | 0.0006(0.0001)   | -0.0008(0.0001) | -0.0130(0.0005) | -0.0122(0.0005) |
| $\nu_{69}(0.3937)$    | -0.0080(0.0002) | -0.0025(0.0001) | -0.0223(0.0016)  | -0.0046(0.0001) | -0.0119(0.0005) | -0.0088(0.0002) |
| $\nu_{72}(0.3949)$    | 0.0096(0.0003)  | 0.0164(0.0009)  | 0.0108(0.0004)   | 0.0154(0.0008)  | 0.0084(0.0002)  | 0.0138(0.0006)  |

**Table S7:** Linear interstate coupling parameters ( $\lambda$ ) for singlet electronic states of **P** obtained at B3LYP/6-311G(d,p) level of theory. Coupling strength ( $\lambda^2/2\omega^2$ ) obtained for each vibrational mode is shown in paranthesis.

| Vibrational mode<br>(Freq. eV) | $\lambda_{S_1-S_2}$ | $\lambda_{S_1-S_3}$ | $\lambda_{S_1-S_4}$ | $\lambda_{S_1-S_5}$ | $\lambda_{S_1-S_6}$ | $\lambda_{S_2-S_3}$ | $\lambda_{S_2-S_5}$ | $\lambda_{S_2-S_6}$ | $\lambda_{S_3-S_4}$ | $\lambda_{S_3-S_6}$ | $\lambda_{S_4-S_5}$ | $\lambda_{S_4-S_6}$ | $\lambda_{S_5-S_6}$ |
|--------------------------------|---------------------|---------------------|---------------------|---------------------|---------------------|---------------------|---------------------|---------------------|---------------------|---------------------|---------------------|---------------------|---------------------|
| $\nu_6(0.0446)$                | -                   | 0.0267(0.1792)      | -                   | 0.0284(0.2027)      | -                   | -                   | -                   | -                   | -                   | -                   | -                   | -                   | -                   |
| $\nu_9(0.0574)$                | 0.0090(0.0123)      | -                   | 0.0346(0.1817)      | -                   | 0.0045(0.0026)      | -                   | -                   | -                   | 0.0401(0.2440)      | -                   | -                   | -                   | 0.0344(0.1796)      |
| $\nu_{11}(0.0629)$             | -                   | -                   | -                   | -                   | 0.0045(0.0026)      | -                   | 0.0305(0.1176)      | -                   | -                   | -                   | -                   | -                   | -                   |
| $\nu_{12}(0.0631)$             | 0.0081(0.0082)      | -                   | 0.0328(0.1351)      | -                   | -                   | -                   | -                   | -                   | 0.0164(0.0338)      | -                   | -                   | -                   | 0.0139(0.0243)      |
| $\nu_{15}(0.0687)$             | -                   | 0.0475(0.2370)      | -                   | 0.0555(0.3263)      | -                   | -                   | -                   | -                   | -                   | -                   | -                   | -                   | -                   |
| $\nu_{19}(0.0873)$             | -                   | -                   | -                   | -                   | 0.0159(0.0166)      | 0.0276(0.0500)      | 0.1221(0.9781)      | -                   | -                   | -                   | 0.0369(0.0853)      | -                   | -                   |
| $\nu_{21}(0.0929)$             | 0.0070(0.0028)      | -                   | 0.0224(0.0291)      | -                   | 0.0267(0.0333)      | -                   | 0.1131(0.5971)      | -                   | 0.0090(0.0047)      | -                   | -                   | -                   | -                   |
| $\nu_{26}(0.1035)$             | -                   | -                   | -                   | -                   | -                   | -                   | -                   | -                   | -                   | -                   | 0.0355(0.0588)      | -                   | -                   |
| $\nu_{33}(0.1216)$             | -                   | 0.0160(0.0087)      | -                   | -                   | -                   | -                   | -                   | 0.0112(0.0042)      | -                   | -                   | -                   | 0.0150(0.0076)      | -                   |
| $\nu_{36}(0.1258)$             | -                   | -                   | -                   | -                   | 0.0218(0.0150)      | 0.0327(0.0338)      | 0.0733(0.1698)      | -                   | -                   | -                   | 0.0169(0.0090)      | -                   | -                   |
| $\nu_{38}(0.1381)$             | -                   | -                   | -                   | -                   | -                   | 0.0249(0.0163)      | 0.0394(0.0407)      | -                   | -                   | -                   | 0.0072(0.0014)      | -                   | -                   |
| $\nu_{39}(0.1397)$             | 0.0129(0.0043)      | -                   | 0.0441(0.0498)      | -                   | -                   | -                   | -                   | -                   | 0.0240(0.0148)      | -                   | -                   | -                   | 0.0191(0.0093)      |
| $\nu_{40}(0.1445)$             | -                   | -                   | -                   | -                   | -                   | -                   | -                   | -                   | -                   | -                   | -                   | -                   | -                   |
| $\nu_{42}(0.1486)$             | 0.0087(0.0017)      | -                   | 0.0381(0.0017)      | -                   | -                   | -                   | -                   | -                   | -                   | -                   | -                   | -                   | -                   |
| $\nu_{43}(0.1493)$             | -                   | -                   | -                   | -                   | -                   | -                   | -                   | 0.0432(0.0419)      | -                   | -                   | -                   | 0.0271(0.0165)      | -                   |
| $\nu_{44}(0.1528)$             | -                   | 0.0198(0.0084)      | -                   | -                   | -                   | -                   | -                   | 0.0037(0.0003)      | -                   | -                   | -                   | 0.0124(0.0033)      | -                   |
| $\nu_{46}(0.1567)$             | 0.0068(0.0009)      | -                   | 0.0355(0.0257)      | -                   | -                   | -                   | -                   | -                   | -                   | -                   | -                   | -                   | -                   |
| $\nu_{47}(0.1573)$             | -                   | -                   | -                   | -                   | 0.0276(0.0154)      | 0.0359(0.0260)      | 0.0790(0.1261)      | -                   | -                   | -                   | 0.0189(0.0072)      | -                   | -                   |
| $\nu_{48}(0.1665)$             | -                   | -                   | -                   | -                   | -                   | -                   | -                   | -                   | -                   | -                   | -                   | 0.0397(0.0284)      | -                   |
| $\nu_{48}(0.1665)$             | -                   | -                   | -                   | -                   | -                   | -                   | -                   | -                   | -                   | -                   | -                   | -                   | -                   |
| $\nu_{50}(0.1736)$             | 0.0254(0.0107)      | -                   | 0.0954(0.1510)      | -                   | -                   | -                   | -                   | -                   | 0.0875(0.1577)      | -                   | -                   | -                   | 0.0563(0.0526)      |
| $\nu_{52}(0.1778)$             | 0.0073(0.0008)      | -                   | 0.0184(0.0054)      | -                   | -                   | -                   | -                   | -                   | -                   | -                   | -                   | -                   | -                   |
| $\nu_{53}(0.1807)$             | -                   | 0.0652(0.0651)      | -                   | 0.0359(0.0197)      | -                   | -                   | -                   | 0.0276(0.0117)      | -                   | -                   | -                   | -                   | -                   |
| $\nu_{54}(0.1810)$             | -                   | -                   | -                   | -                   | -                   | -                   | -                   | -                   | -                   | -                   | -                   | -                   | -                   |
| $\nu_{55}(0.1839)$             | -                   | -                   | -                   | -                   | -                   | -                   | -                   | -                   | -                   | -                   | -                   | -                   | -                   |
| $\nu_{56}(0.1879)$             | -                   | 0.0863(0.1055)      | -                   | 0.0782(0.0866)      | -                   | -                   | -                   | -                   | -                   | -                   | 0.0502(0.0385)      | -                   | -                   |
| $\nu_{57}(0.1904)$             | 0.0024(0.0001)      | -                   | -                   | -                   | -                   | -                   | -                   | -                   | -                   | -                   | 0.0603(0.0538)      | -                   | -                   |
| $\nu_{59}(0.2016)$             | 0.0387(0.0184)      | -                   | -                   | 0.0782(0.0866)      | -                   | -                   | -                   | 0.0337(0.0161)      | -                   | -                   | -                   | -                   | -                   |
| $\nu_{60}(0.2028)$             | -                   | -                   | 0.1404(0.2425)      | -                   | -                   | -                   | -                   | -                   | -                   | 0.1151(0.1630)      | -                   | -                   | 0.0594(0.0434)      |
| $\nu_{61}(0.2041)$             | -                   | 0.0228(0.0062)      | -                   | -                   | 0.0636(0.0492)      | 0.0330(0.0132)      | 0.1463(0.2602)      | -                   | -                   | -                   | 0.0486(0.0287)      | -                   | -                   |
| $\nu_{63}(0.3913)$             | -                   | -                   | -                   | 0.0596(0.0426)      | -                   | -                   | -                   | 0.0693(0.0576)      | -                   | -                   | -                   | 0.0593(0.0422)      | -                   |
| $\nu_{64}(0.3913)$             | -                   | -                   | 0.0050(0.0001)      | -                   | 0.0048(0.0001)      | -                   | 0.0237(0.0018)      | -                   | -                   | 0.0054(0.0001)      | -                   | -                   | -                   |
| $\nu_{66}(0.3918)$             | -                   | -                   | -                   | -                   | 0.0042(0.0001)      | 0.0071(0.0002)      | -                   | -                   | 0.0108(0.0001)      | -                   | -                   | -                   | -                   |
| $\nu_{67}(0.3927)$             | -                   | 0.0178(0.0010)      | -                   | -                   | -                   | -                   | -                   | 0.0009(0.0001)      | -                   | -                   | -                   | -                   | -                   |
| $\nu_{68}(0.3928)$             | 0.0038(0.0001)      | -                   | 0.0096(0.0001)      | -                   | -                   | -                   | -                   | -                   | -                   | -                   | -                   | 0.0045(0.0001)      | -                   |
| $\nu_{70}(0.3937)$             | -                   | -                   | -                   | 0.0179(0.0010)      | -                   | -                   | -                   | -                   | -                   | -                   | -                   | 0.0014(0.0001)      | 0.0087(0.0001)      |
| $\nu_{71}(0.3948)$             | -                   | -                   | -                   | -                   | 0.0038(0.0001)      | 0.0085(0.0002)      | 0.0048(0.0001)      | -                   | -                   | -                   | 0.0004(0.0001)      | -                   | -                   |



**Table S8:** Linear intrastate coupling parameters ( $\kappa$ ) for triplet electronic states of **P** obtained at B3LYP/6-311G(d,p) level of theory. Coupling strength ( $\kappa^2/2\omega^2$ ) obtained for each vibrational mode is shown in paranthesis.

| AG mode<br>(Freq, eV) | $\kappa^{T_1}$  | $\kappa^{T_2}$  | $\kappa^{T_3}$  | $\kappa^{T_4}$  | $\kappa^{T_5}$  | $\kappa^{T_6}$  |
|-----------------------|-----------------|-----------------|-----------------|-----------------|-----------------|-----------------|
| $\nu_8(0.0511)$       | -0.0557(0.5946) | -0.0168(0.0537) | -0.0009(0.0002) | -0.0416(0.3321) | -0.0352(0.2375) | 0.0276(0.1454)  |
| $\nu_{17}(0.0738)$    | -0.0058(0.0031) | -0.0308(0.0868) | -0.0291(0.0778) | -0.0411(0.1553) | -0.0749(0.5149) | -0.0531(0.2589) |
| $\nu_{25}(0.1010)$    | -0.0128(0.0080) | 0.0050(0.0012)  | -0.0004(0.0001) | -0.0211(0.0218) | -0.0022(0.0002) | 0.0230(0.0259)  |
| $\nu_{37}(0.1353)$    | -0.0199(0.0108) | -0.0531(0.0769) | 0.0115(0.0036)  | -0.0434(0.0515) | -0.0889(0.2157) | -0.0363(0.0359) |
| $\nu_{41}(0.1448)$    | -0.0530(0.0669) | 0.0139(0.0046)  | -0.0990(0.2336) | 0.0088(0.0018)  | -0.0312(0.0233) | 0.0607(0.0878)  |
| $\nu_{45}(0.1565)$    | 0.1570(0.5032)  | 0.0897(0.1532)  | -0.0176(0.0063) | 0.0909(0.1688)  | 0.0085(0.0015)  | 0.0685(0.0957)  |
| $\nu_{49}(0.1676)$    | -0.0136(0.0033) | -0.0181(0.0058) | -0.0562(0.0563) | -0.0267(0.0127) | -0.0403(0.0289) | 0.0892(0.1415)  |
| $\nu_{51}(0.1770)$    | -0.1141(0.2079) | -0.1086(0.1883) | -0.0489(0.0382) | -0.1184(0.2237) | -0.0924(0.1364) | 0.0232(0.0086)  |
| $\nu_{58}(0.1979)$    | -0.0219(0.0061) | 0.0539(0.0371)  | 0.0999(0.1273)  | 0.0435(0.0241)  | -0.0984(0.1236) | 0.1457(0.2710)  |
| $\nu_{62}(0.2072)$    | 0.2454(0.7012)  | -0.0091(0.0010) | 0.2505(0.7308)  | 0.0023(0.0001)  | 0.1099(0.1407)  | -0.2028(0.4790) |
| $\nu_{65}(0.3917)$    | -0.0099(0.0003) | 0.0039(0.0001)  | 0.0014(0.0001)  | -0.0056(0.0001) | -0.0114(0.0004) | 0.0089(0.0003)  |
| $\nu_{69}(0.3937)$    | -0.0084(0.0002) | 0.0002(0.0001)  | -0.0319(0.0033) | -0.0044(0.0001) | -0.0026(0.0001) | 0.0005(0.0001)  |
| $\nu_{72}(0.3949)$    | 0.0119(0.0005)  | 0.0173(0.0010)  | 0.0077(0.0002)  | 0.0147(0.0007)  | 0.0136(0.0006)  | 0.0205(0.0013)  |

**Table S9:** Linear interstate coupling parameters ( $\lambda$ ) for triplet electronic states of **P** obtained at B3LYP/6-311G(d,p) level of theory. Coupling strength ( $\lambda^2/2\omega^2$ ) obtained for each vibrational mode is shown in paranthesis.

| Vibrational mode<br>(Freq, eV) | $\lambda_{T_1} - T_2$ | $\lambda_{T_1} - T_3$ | $\lambda_{T_1} - T_4$ | $\lambda_{T_1} - T_5$ | $\lambda_{T_2} - T_3$ | $\lambda_{T_2} - T_5$ | $\lambda_{T_2} - T_6$ | $\lambda_{T_3} - T_4$ | $\lambda_{T_3} - T_5$ | $\lambda_{T_3} - T_6$ | $\lambda_{T_4} - T_5$ | $\lambda_{T_4} - T_6$ | $\lambda_{T_5} - T_6$ |
|--------------------------------|-----------------------|-----------------------|-----------------------|-----------------------|-----------------------|-----------------------|-----------------------|-----------------------|-----------------------|-----------------------|-----------------------|-----------------------|-----------------------|
| $\nu_6(0.0446)$                | -                     | 0.0272(0.1860)        | -                     | -                     | -                     | -                     | -                     | -                     | -                     | 0.0120(0.0362)        | -                     | -                     | -                     |
| $\nu_9(0.0574)$                | 0.0308(0.1440)        | -                     | 0.0318 (0.1535)       | -                     | -                     | -                     | 0.0210(0.0669)        | -                     | 0.0340 (0.1754)       | -                     | -                     | 0.0185 (0.0519)       | -                     |
| $\nu_{11}(0.0629)$             | -                     | -                     | -                     | -                     | 0.0099 (0.0124)       | -                     | -                     | -                     | -                     | -                     | -                     | -                     | 0.0139 (0.0244)       |
| $\nu_{12}(0.0631)$             | 0.0400(0.2009)        | -                     | 0.0405 (0.2060)       | -                     | -                     | -                     | 0.0222(0.0619)        | -                     | 0.0087 (0.0095)       | -                     | -                     | 0.0190 (0.0453)       | -                     |
| $\nu_{15}(0.0687)$             | -                     | 0.0234(0.0580)        | -                     | -                     | -                     | 0.0069 (0.0050)       | -                     | -                     | -                     | 0.0085 (0.0077)       | -                     | -                     | -                     |
| $\nu_{19}(0.0873)$             | -                     | -                     | -                     | -                     | 0.0260 (0.0443)       | -                     | -                     | -                     | -                     | -                     | -                     | -                     | 0.0131 (0.0113)       |
| $\nu_{21}(0.0929)$             | -                     | -                     | -                     | -                     | -                     | -                     | 0.0118(0.0081)        | -                     | -                     | -                     | -                     | -                     | -                     |
| $\nu_{26}(0.1035)$             | -                     | -                     | -                     | -                     | -                     | -                     | -                     | 0.0133(0.0083)        | -                     | -                     | -                     | 0.0102 (0.0060)       | -                     |
| $\nu_{33}(0.1216)$             | -                     | -                     | -                     | -                     | -                     | 0.0298 (0.0300)       | -                     | -                     | -                     | 0.0177(0.0106)        | -                     | -                     | 0.0197 (0.0181)       |
| $\nu_{36}(0.1258)$             | -                     | -                     | -                     | -                     | 0.0348 (0.0383)       | -                     | -                     | -                     | -                     | -                     | -                     | -                     | -                     |
| $\nu_{38}(0.1381)$             | -                     | -                     | -                     | -                     | 0.0068 (0.0012)       | -                     | -                     | -                     | -                     | -                     | -                     | -                     | 0.0219 (0.0152)       |
| $\nu_{39}(0.1397)$             | 0.0505(0.0653)        | -                     | 0.0301 (0.0232)       | -                     | -                     | -                     | 0.0315(0.0254)        | 0.0065(0.0011)        | -                     | -                     | -                     | 0.0326 (0.0272)       | -                     |
| $\nu_{40}(0.1445)$             | -                     | -                     | -                     | -                     | -                     | -                     | -                     | -                     | 0.0540 (0.0747)       | -                     | -                     | -                     | -                     |
| $\nu_{42}(0.1486)$             | 0.0435(0.0428)        | -                     | -                     | -                     | -                     | -                     | 0.0316(0.0226)        | -                     | -                     | 0.0298(0.0213)        | -                     | -                     | -                     |
| $\nu_{43}(0.1493)$             | -                     | -                     | -                     | -                     | -                     | 0.0481 (0.0519)       | -                     | -                     | -                     | -                     | 0.0239 (0.0129)       | -                     | -                     |
| $\nu_{44}(0.1528)$             | -                     | -                     | -                     | -                     | -                     | 0.0458 (0.0449)       | -                     | -                     | -                     | 0.0313(0.0220)        | -                     | -                     | -                     |
| $\nu_{46}(0.1567)$             | -                     | -                     | -                     | -                     | -                     | -                     | -                     | -                     | -                     | 0.0344(0.0253)        | -                     | -                     | -                     |
| $\nu_{47}(0.1573)$             | -                     | -                     | 0.0181 (0.0067)       | -                     | 0.0475 (0.0456)       | -                     | 0.0150(0.0046)        | -                     | 0.0186 (0.0070)       | -                     | -                     | -                     | 0.0077 (0.0012)       |
| $\nu_{48}(0.1665)$             | -                     | -                     | -                     | -                     | -                     | -                     | -                     | -                     | -                     | 0.0345(0.0215)        | -                     | -                     | -                     |
| $\nu_{50}(0.1736)$             | 0.0850(0.1199)        | -                     | 0.0992 (0.1633)       | -                     | -                     | -                     | 0.0503(0.0420)        | -                     | 0.0844 (0.1182)       | -                     | -                     | 0.0364 (0.0220)       | -                     |
| $\nu_{52}(0.1778)$             | 0.0228(0.0082)        | -                     | 0.0121 (0.0023)       | -                     | -                     | -                     | 0.0152(0.0037)        | -                     | 0.0077 (0.0009)       | -                     | -                     | 0.0165 (0.0043)       | -                     |
| $\nu_{53}(0.1807)$             | -                     | 0.0873(0.1167)        | -                     | -                     | -                     | 0.0319 (0.0156)       | -                     | -                     | -                     | 0.0292 (0.0131)       | -                     | -                     | -                     |
| $\nu_{54}(0.1810)$             | -                     | -                     | -                     | -                     | 0.0227 (0.0079)       | -                     | -                     | 0.0034(0.0002)        | -                     | -                     | -                     | -                     | 0.0187 (0.0053)       |
| $\nu_{55}(0.1839)$             | -                     | -                     | -                     | -                     | 0.0674(0.0672)        | -                     | -                     | -                     | -                     | -                     | -                     | -                     | 0.0344 (0.0175)       |
| $\nu_{56}(0.1879)$             | -                     | -                     | -                     | -                     | -                     | 0.0678 (0.0651)       | -                     | -                     | -                     | -                     | 0.0387 (0.0212)       | -                     | -                     |
| $\nu_{57}(0.1904)$             | 0.0307(0.0130)        | -                     | 0.0463 (0.0296)       | -                     | -                     | -                     | 0.0226(0.0070)        | -                     | 0.0227 (0.0071)       | -                     | -                     | 0.0101 (0.0014)       | -                     |
| $\nu_{59}(0.2016)$             | 0.1371(0.2312)        | -                     | 0.1465 (0.2640)       | -                     | -                     | -                     | 0.0914(0.1028)        | -                     | 0.1416 (0.2467)       | -                     | -                     | 0.0751 (0.0694)       | -                     |
| $\nu_{60}(0.2028)$             | -                     | -                     | -                     | -                     | 0.0337 (0.0138)       | -                     | -                     | -                     | -                     | -                     | -                     | -                     | 0.0635 (0.0490)       |
| $\nu_{61}(0.2041)$             | -                     | 0.0692(0.0575)        | -                     | -                     | -                     | 0.0771 (0.0713)       | -                     | -                     | -                     | 0.0627(0.0472)        | -                     | -                     | -                     |
| $\nu_{63}(0.3913)$             | -                     | -                     | -                     | -                     | -                     | -                     | -                     | 0.0033(0.0001)        | -                     | -                     | -                     | -                     | 0.0018 (0.0001)       |
| $\nu_{64}(0.3913)$             | -                     | -                     | 0.0099 (0.0003)       | -                     | -                     | -                     | 0.0043(0.0001)        | -                     | 0.0128 (0.0005)       | -                     | -                     | 0.0061 (0.0001)       | -                     |
| $\nu_{66}(0.3918)$             | -                     | -                     | -                     | -                     | -                     | -                     | -                     | 0.0020(0.0001)        | -                     | -                     | -                     | -                     | 0.0005 (0.0001)       |
| $\nu_{67}(0.3927)$             | -                     | -                     | -                     | -                     | 0.0059 (0.0001)       | -                     | -                     | -                     | -                     | -                     | 0.0047 (0.0001)       | -                     | -                     |
| $\nu_{68}(0.3928)$             | 0.0135(0.0006)        | -                     | -                     | -                     | -                     | -                     | 0.0073(0.0002)        | -                     | -                     | -                     | -                     | -                     | -                     |
| $\nu_{70}(0.3937)$             | -                     | -                     | -                     | -                     | -                     | -                     | -                     | -                     | -                     | 0.0118(0.0004)        | 0.0042 (0.0001)       | -                     | -                     |
| $\nu_{71}(0.3948)$             | -                     | -                     | -                     | -                     | 0.0040 (0.0001)       | -                     | -                     | -                     | -                     | -                     | -                     | -                     | 0.0056 (0.0001)       |

**Table S10:** Linear intrastate coupling parameters ( $\kappa$ ) for singlet electronic states of **AP2** obtained at B3LYP/6-311G(d,p) level of theory. Coupling strength ( $\kappa^2/2\omega^2$ ) obtained for each vibrational mode is shown in paranthesis.

| A mode<br>(Freq, eV) | $\kappa^{S1}$   | $\kappa^{S2}$   | $\kappa^{S3}$   | $\kappa^{S4}$   | $\kappa^{S5}$   | $\kappa^{S6}$   |
|----------------------|-----------------|-----------------|-----------------|-----------------|-----------------|-----------------|
| $\nu_1$ (0.0060)     | 0.0141(2.7613)  | 0.0243(8.2013)  | 0.0361(18.0946) | 0.0233(7.5452)  | 0.0140(2.7296)  | 0.0069(0.6594)  |
| $\nu_3$ (0.0077)     | 0.0024(0.0486)  | 0.0124(1.2967)  | 0.0254(5.4433)  | 0.0137(1.5772)  | 0.0147(1.8321)  | 0.0105(0.9226)  |
| $\nu_6$ (0.0181)     | -0.0029(0.0128) | -0.0003(0.0001) | 0.0043(0.0289)  | 0.0075(0.0862)  | 0.0046(0.0324)  | 0.0001(0.0001)  |
| $\nu_7$ (0.0208)     | 0.0026(0.0078)  | 0.0148(0.2531)  | 0.0194(0.4347)  | 0.0093(0.0993)  | 0.0035(0.0145)  | 0.0022(0.0056)  |
| $\nu_{10}$ (0.0233)  | 0.0038(0.0133)  | -0.0008(0.0006) | -0.0019(0.0034) | -0.0038(0.0132) | -0.0126(0.1459) | -0.0152(0.2133) |
| $\nu_{12}$ (0.0331)  | 0.0059(0.0159)  | -0.0009(0.0004) | -0.0127(0.0738) | -0.0004(0.0001) | 0.0020(0.0018)  | 0.0078(0.0278)  |
| $\nu_{15}$ (0.0383)  | 0.0105(0.0376)  | -0.0036(0.0044) | -0.0002(0.0001) | 0.0078(0.0210)  | 0.0200(0.1364)  | 0.0181(0.1112)  |
| $\nu_{17}$ (0.0453)  | -0.0144(0.0505) | -0.0072(0.0126) | -0.0136(0.0452) | -0.0055(0.0073) | -0.0298(0.2159) | -0.0234(0.1334) |
| $\nu_{18}$ (0.0526)  | -0.0232(0.0973) | -0.0113(0.0231) | -0.0024(0.0011) | 0.0020(0.0007)  | -0.0317(0.1813) | -0.0283(0.1448) |
| $\nu_{20}$ (0.0601)  | 0.0068(0.0064)  | 0.0118(0.0193)  | 0.0174(0.0421)  | -0.0104(0.0148) | 0.0134(0.0247)  | 0.0130(0.0235)  |
| $\nu_{24}$ (0.0661)  | 0.0085(0.0083)  | -0.0031(0.0011) | -0.0129(0.0192) | -0.0201(0.0464) | -0.0029(0.0010) | 0.0024(0.0006)  |
| $\nu_{26}$ (0.0689)  | 0.0061(0.0039)  | 0.0035(0.0013)  | 0.0063(0.0042)  | -0.0161(0.0273) | -0.0026(0.0007) | -0.0061(0.0039) |
| $\nu_{28}$ (0.0733)  | -0.0040(0.0015) | 0.0164(0.0250)  | 0.0318(0.0942)  | -0.0053(0.0026) | -0.0178(0.0295) | -0.0260(0.0628) |
| $\nu_{30}$ (0.0802)  | -0.0005(0.0001) | 0.0106(0.0087)  | 0.0025(0.0005)  | -0.0030(0.0007) | -0.0089(0.0061) | -0.0125(0.0121) |
| $\nu_{32}$ (0.0822)  | 0.0078(0.0045)  | 0.0306(0.0693)  | 0.0417(0.1285)  | 0.0292(0.0629)  | 0.0232(0.0398)  | 0.0204(0.0309)  |
| $\nu_{34}$ (0.0877)  | 0.0113(0.0083)  | 0.0182(0.0215)  | 0.0152(0.0149)  | 0.0076(0.0037)  | 0.0183(0.0219)  | -0.0123(0.0099) |
| $\nu_{35}$ (0.0892)  | 0.0005(0.0001)  | 0.0076(0.0036)  | 0.0097(0.0060)  | -0.0019(0.0002) | 0.0070(0.0031)  | -0.0014(0.0001) |
| $\nu_{38}$ (0.1026)  | 0.0015(0.0001)  | -0.0036(0.0006) | 0.0072(0.0025)  | 0.0078(0.0029)  | 0.0036(0.0006)  | 0.0072(0.0024)  |
| $\nu_{40}$ (0.1031)  | 0.0136(0.0087)  | -0.0066(0.0020) | -0.0004(0.0001) | 0.0027(0.0003)  | 0.0199(0.0185)  | -0.0121(0.0068) |
| $\nu_{43}$ (0.1074)  | 0.0008(0.0001)  | 0.0114(0.0056)  | 0.0138(0.0082)  | 0.0160(0.0112)  | 0.0503(0.1096)  | 0.0330(0.0471)  |
| $\nu_{44}$ (0.1138)  | -0.0063(0.0015) | 0.0002(0.0001)  | -0.0001(0.0001) | -0.0025(0.0002) | -0.0023(0.0002) | -0.0003(0.0001) |
| $\nu_{46}$ (0.1210)  | 0.0064(0.0014)  | 0.0058(0.0011)  | 0.0144(0.0071)  | 0.0078(0.0021)  | 0.0187(0.0120)  | 0.0062(0.0013)  |
| $\nu_{48}$ (0.1224)  | 0.0013(0.0001)  | 0.0063(0.0013)  | 0.0050(0.0008)  | 0.0008(0.0001)  | 0.0108(0.0039)  | 0.0114(0.0043)  |
| $\nu_{52}$ (0.1282)  | -0.0158(0.0076) | -0.0167(0.0085) | -0.0089(0.0024) | 0.0005(0.0001)  | -0.0074(0.0017) | -0.0059(0.0010) |
| $\nu_{54}$ (0.1314)  | 0.0017(0.0001)  | -0.0125(0.0045) | -0.0173(0.0086) | -0.0066(0.0013) | 0.0118(0.0040)  | 0.0224(0.0145)  |
| $\nu_{55}$ (0.1369)  | -0.0173(0.0080) | 0.0024(0.0002)  | 0.0162(0.0070)  | -0.0200(0.0107) | -0.0026(0.0002) | -0.0065(0.0011) |
| $\nu_{57}$ (0.1446)  | -0.0354(0.0300) | 0.0125(0.0037)  | 0.0279(0.0186)  | 0.0059(0.0008)  | -0.0092(0.0020) | -0.0152(0.0055) |
| $\nu_{59}$ (0.1480)  | 0.0050(0.0006)  | 0.0145(0.0048)  | 0.0204(0.0095)  | -0.0004(0.0001) | -0.0280(0.0179) | -0.0242(0.0133) |
| $\nu_{64}$ (0.1574)  | 0.0963(0.1872)  | 0.0951(0.1825)  | 0.1076(0.2336)  | 0.0905(0.1654)  | 0.0690(0.0962)  | 0.0678(0.0928)  |
| $\nu_{65}$ (0.1584)  | 0.0201(0.0081)  | 0.0497(0.0492)  | 0.0669(0.0893)  | 0.0302(0.0181)  | 0.0317(0.0201)  | 0.0390(0.0302)  |
| $\nu_{67}$ (0.1694)  | -0.0048(0.0004) | -0.0066(0.0008) | -0.0355(0.0219) | -0.0005(0.0001) | 0.0288(0.0144)  | 0.0298(0.0155)  |
| $\nu_{68}$ (0.1718)  | -0.0298(0.0150) | -0.0416(0.0293) | -0.0451(0.0345) | -0.0352(0.0210) | 0.0154(0.0040)  | 0.0033(0.0002)  |
| $\nu_{70}$ (0.1727)  | -0.0559(0.0524) | -0.0112(0.0021) | 0.0164(0.0045)  | -0.0397(0.0265) | 0.0072(0.0009)  | -0.0129(0.0028) |
| $\nu_{73}$ (0.1790)  | 0.0316(0.0156)  | 0.0304(0.0144)  | 0.0543(0.0459)  | 0.0290(0.0132)  | 0.0397(0.0246)  | 0.0015(0.0001)  |
| $\nu_{76}$ (0.1829)  | 0.0011(0.0001)  | 0.0081(0.0010)  | 0.0159(0.0038)  | 0.0093(0.0013)  | 0.0099(0.0015)  | -0.0056(0.0005) |
| $\nu_{78}$ (0.1840)  | -0.0098(0.0014) | -0.0205(0.0062) | -0.0309(0.0141) | -0.0122(0.0022) | -0.0117(0.0020) | 0.0122(0.0022)  |
| $\nu_{79}$ (0.1847)  | -0.0098(0.0014) | 0.0112(0.0018)  | 0.0096(0.0013)  | 0.0025(0.0001)  | -0.0251(0.0092) | 0.0099(0.0014)  |
| $\nu_{82}$ (0.1926)  | 0.0401(0.0217)  | 0.0256(0.0088)  | 0.0411(0.0227)  | -0.0199(0.0053) | 0.0016(0.0001)  | -0.0108(0.0016) |
| $\nu_{84}$ (0.2012)  | 0.0328(0.0133)  | 0.0319(0.0126)  | 0.0348(0.0150)  | 0.0291(0.0104)  | 0.0560(0.0387)  | 0.0231(0.0066)  |
| $\nu_{86}$ (0.2065)  | -0.1260(0.1862) | -0.0558(0.0365) | -0.0779(0.0712) | -0.0079(0.0007) | -0.1370(0.2202) | -0.1481(0.2572) |
| $\nu_{88}$ (0.2177)  | -0.0525(0.0291) | -0.1020(0.1098) | -0.1503(0.2384) | -0.0500(0.0264) | -0.0507(0.0272) | -0.0496(0.0260) |
| $\nu_{90}$ (0.3765)  | 0.0077(0.0002)  | -0.0035(0.0001) | -0.0025(0.0001) | 0.0023(0.0001)  | 0.0092(0.0003)  | 0.0085(0.0003)  |
| $\nu_{91}$ (0.3847)  | 0.0003(0.0001)  | -0.0005(0.0001) | -0.0009(0.0001) | 0.0001(0.0001)  | -0.0018(0.0001) | -0.0027(0.0001) |
| $\nu_{94}$ (0.3889)  | -0.0006(0.0001) | 0.0086(0.0002)  | 0.0096(0.0003)  | 0.0012(0.0001)  | -0.0015(0.0001) | 0.0010(0.0001)  |
| $\nu_{95}$ (0.3922)  | 0.0006(0.0001)  | 0.0026(0.0001)  | 0.0019(0.0001)  | 0.0020(0.0001)  | 0.0018(0.0001)  | 0.0034(0.0001)  |
| $\nu_{97}$ (0.3929)  | -0.0072(0.0002) | -0.0042(0.0001) | -0.0038(0.0001) | -0.0055(0.0001) | -0.0121(0.0005) | -0.0067(0.0001) |
| $\nu_{99}$ (0.3954)  | 0.0041(0.0001)  | 0.0009(0.0001)  | -0.0004(0.0001) | 0.0068(0.0001)  | 0.0057(0.0001)  | 0.0045(0.0001)  |
| $\nu_{100}$ (0.3983) | -0.0021(0.0001) | -0.0031(0.0001) | -0.0016(0.0001) | -0.0049(0.0001) | -0.0032(0.0001) | -0.0025(0.0001) |
| $\nu_{102}$ (0.3999) | -0.0011(0.0001) | 0.0011(0.0001)  | 0.0023(0.0001)  | -0.0015(0.0001) | -0.0039(0.0001) | -0.0064(0.0001) |

**Table S11:** Linear interstate coupling parameters ( $\lambda$ ) for singlet electronic states of **AP2** obtained at B3LYP/6-311G(d,p) level of theory. Coupling strength ( $\lambda^2/2\omega^2$ ) obtained for each vibrational mode is shown in paranthesis.

| B mode<br>(Freq. eV) | $\lambda_{S_1-S_2}$ | $\lambda_{S_1-S_4}$ | $\lambda_{S_1-S_5}$ | $\lambda_{S_1-S_6}$ | $\lambda_{S_2-S_3}$ | $\lambda_{S_3-S_4}$ | $\lambda_{S_3-S_5}$ | $\lambda_{S_3-S_6}$ |
|----------------------|---------------------|---------------------|---------------------|---------------------|---------------------|---------------------|---------------------|---------------------|
| $\nu_2$ (0.0062)     | 0.0018(0.0421)      | 0.0383(19.0803)     | 0.0043(0.2405)      | -                   | -                   | 0.0096(1.1988)      | 0.0505(33.1718)     | 0.0516(34.6327)     |
| $\nu_3$ (0.0080)     | 0.0083(0.5382)      | 0.0326(8.3028)      | 0.0218(3.7128)      | 0.0183(2.6163)      | -                   | 0.0063(0.3101)      | 0.0359(10.0688)     | 0.0395(12.1895)     |
| $\nu_4$ (0.0156)     | 0.0067(0.0922)      | 0.0451(4.1790)      | -                   | -                   | -                   | 0.0119(0.2909)      | 0.0556(6.3514)      | 0.0644(8.5210)      |
| $\nu_8$ (0.0214)     | 0.0084(0.0770)      | 0.0365(1.4545)      | -                   | -                   | -                   | 0.0077(0.0647)      | 0.0317(1.0971)      | 0.0338(1.2473)      |
| $\nu_9$ (0.0217)     | 0.0026(0.0072)      | 0.0547(3.1771)      | -                   | -                   | -                   | 0.0153(0.2486)      | 0.0658(4.5973)      | 0.0753(6.0206)      |
| $\nu_{11}$ (0.0285)  | 0.0078(0.0375)      | 0.0364(0.8156)      | 0.0255(0.4003)      | 0.0131(0.1056)      | -                   | 0.0079(0.0384)      | 0.0457(1.2856)      | 0.0487(1.4600)      |
| $\nu_{13}$ (0.0336)  | 0.0120(0.0638)      | 0.0558(1.3790)      | 0.0256(0.2368)      | 0.0047(0.0098)      | -                   | 0.0153(0.1037)      | 0.0624(1.7245)      | 0.0732(2.3731)      |
| $\nu_{14}$ (0.0372)  | 0.0062(0.0139)      | 0.0362(0.4735)      | 0.0211(0.1609)      | 0.0211(0.1609)      | -                   | 0.0070(0.0177)      | 0.0386(0.5385)      | 0.0418(0.6313)      |
| $\nu_{16}$ (0.0429)  | 0.0199(0.1076)      | 0.0266(0.1922)      | 0.0409(0.4545)      | 0.0404(0.4434)      | -                   | 0.0012(0.0004)      | 0.0083(0.0187)      | 0.0083(0.0187)      |
| $\nu_{19}$ (0.0538)  | 0.0144(0.0358)      | 0.0291(0.1463)      | 0.0285(0.1403)      | 0.0192(0.1403)      | -                   | 0.0098(0.0205)      | 0.0195(0.0657)      | 0.0129(0.0287)      |
| $\nu_{21}$ (0.0609)  | 0.0109(0.0160)      | 0.0356(0.1709)      | -                   | -                   | -                   | 0.0076(0.0078)      | 0.0386(0.2009)      | 0.0407(0.2233)      |
| $\nu_{22}$ (0.0631)  | 0.0092(0.0106)      | 0.0159(0.0317)      | 0.0217(0.0591)      | -                   | 0.0105(0.0137)      | 0.0003(0.0001)      | -                   | -                   |
| $\nu_{23}$ (0.0635)  | 0.0110(0.0150)      | 0.0188(0.0438)      | -                   | -                   | -                   | -                   | -                   | -                   |
| $\nu_{25}$ (0.0662)  | 0.0157(0.0281)      | 0.0623(0.4428)      | 0.0305(0.1061)      | 0.0255(-0.7442)     | -                   | 0.0167(0.0318)      | 0.0667(0.5076)      | 0.0748(0.6383)      |
| $\nu_{27}$ (0.0699)  | 0.0069(0.0049)      | 0.0732(0.5483)      | 0.0242(0.0599)      | 0.0238(0.0580)      | -                   | 0.0253(0.0655)      | 0.0920(0.8661)      | 0.1057(1.1433)      |
| $\nu_{29}$ (0.0777)  | 0.0079(0.0052)      | 0.0560(0.2597)      | 0.0269(0.0599)      | 0.0152(0.0191)      | -                   | 0.0153(0.0194)      | 0.0671(0.3729)      | 0.0745(0.4597)      |
| $\nu_{31}$ (0.0810)  | -                   | 0.0015(0.0002)      | -                   | -                   | 0.0136(0.0141)      | -                   | -                   | -                   |
| $\nu_{33}$ (0.0877)  | 0.0033(0.0007)      | 0.0286(0.0532)      | 0.0169(0.0186)      | 0.0047(0.0014)      | -                   | 0.0056(0.0020)      | 0.0346(0.0778)      | 0.0377(0.0924)      |
| $\nu_{36}$ (0.0910)  | -                   | 0.0230(0.0319)      | -                   | -                   | -                   | 0.0051(0.0016)      | 0.0314(0.0595)      | 0.0240(0.0348)      |
| $\nu_{37}$ (0.0956)  | 0.0094(0.0048)      | 0.0237(0.0307)      | 0.0231(0.0292)      | 0.0142(0.0110)      | -                   | 0.0031(0.0005)      | 0.0177(0.0171)      | 0.0118(0.0076)      |
| $\nu_{39}$ (0.1030)  | 0.0119(0.0067)      | 0.0191(0.0172)      | -                   | -                   | -                   | 0.0009(0.0001)      | -                   | -                   |
| $\nu_{41}$ (0.1045)  | -                   | 0.0260(0.0310)      | 0.0255(0.0298)      | 0.0297(0.0404)      | -                   | 0.0080(0.0011)      | 0.0200(0.0183)      | 0.0246(0.0277)      |
| $\nu_{42}$ (0.1062)  | 0.0090(0.0036)      | 0.0100(0.0044)      | 0.0181(0.0145)      | 0.0095(0.0040)      | 0.0094(0.0040)      | 0.0001(0.0001)      | 0.0528(0.1001)      | 0.0595(0.1271)      |
| $\nu_{45}$ (0.1180)  | 0.0135(0.0065)      | 0.0454(0.0740)      | 0.0222(0.0177)      | 0.0181(0.0118)      | -                   | 0.0109(0.0043)      | 0.0076(0.0019)      | 0.0222(0.0161)      |
| $\nu_{47}$ (0.1216)  | 0.0081(0.0022)      | 0.0113(0.0043)      | -                   | -                   | -                   | 0.0008(0.0001)      | 0.0216(0.0152)      | 0.0419(0.0550)      |
| $\nu_{49}$ (0.1231)  | 0.0060(0.0012)      | 0.0026(0.0002)      | 0.0174(0.0099)      | 0.0126(0.0052)      | -                   | 0.0032(0.0003)      | 0.0275(0.0228)      | 0.0276(0.0229)      |
| $\nu_{50}$ (0.1239)  | 0.0102(0.0034)      | 0.0208(0.0141)      | 0.0290(0.0264)      | 0.0230(0.0166)      | -                   | 0.0069(0.0015)      | 0.0396(0.0492)      | 0.0484(0.0391)      |
| $\nu_{51}$ (0.1263)  | 0.0097(0.0029)      | 0.0359(0.0404)      | -                   | -                   | -                   | 0.0036(0.0004)      | 0.0275(0.0228)      | 0.0331(0.0278)      |
| $\nu_{53}$ (0.1289)  | 0.0020(0.0001)      | 0.0165(0.0082)      | -                   | -                   | -                   | 0.0051(0.0007)      | 0.0463(0.0496)      | 0.0493(0.0562)      |
| $\nu_{56}$ (0.1405)  | -                   | 0.0284(0.0204)      | 0.0345(0.0275)      | 0.0123(0.0038)      | -                   | 0.0080(0.0015)      | 0.0629(0.0893)      | 0.0713(0.1148)      |
| $\nu_{58}$ (0.1470)  | -                   | 0.0511(0.0590)      | 0.0331(0.0247)      | 0.0324(0.0237)      | -                   | 0.0130(0.0038)      | 0.0923(0.1888)      | 0.0923(0.1888)      |
| $\nu_{60}$ (0.1488)  | -                   | 0.0634(0.0890)      | 0.0086(0.0016)      | 0.0249(0.0131)      | -                   | 0.0204(0.0092)      | 0.0811(0.1458)      | 0.1074(0.2429)      |
| $\nu_{61}$ (0.1502)  | -                   | 0.0869(0.1590)      | 0.0240(0.0121)      | 0.0175(0.0063)      | -                   | 0.0300(0.0089)      | 0.0933(0.1833)      | 0.0877(0.1588)      |
| $\nu_{62}$ (0.1541)  | -                   | 0.0672(0.0933)      | -                   | -                   | -                   | 0.0203(0.0085)      | 0.0756(0.1180)      | 0.0577(0.1588)      |
| $\nu_{63}$ (0.1556)  | -                   | 0.0348(0.0220)      | 0.0129(0.0034)      | -                   | -                   | 0.0082(0.0012)      | 0.0394(0.0282)      | 0.0429(0.0334)      |
| $\nu_{66}$ (0.1659)  | -                   | 0.0665(0.0748)      | -                   | -                   | -                   | 0.0210(0.0075)      | 0.0794(0.1067)      | 0.0907(0.1392)      |
| $\nu_{69}$ (0.1719)  | -                   | 0.0663(0.0734)      | -                   | -                   | -                   | 0.0149(0.0037)      | 0.0484(0.0391)      | 0.0571(0.0545)      |
| $\nu_{71}$ (0.1730)  | 0.0229(0.0088)      | 0.0663(0.0734)      | 0.0341(0.0189)      | 0.0456(0.0339)      | -                   | 0.0063(0.0006)      | 0.0356(0.0207)      | 0.0466(0.0354)      |
| $\nu_{72}$ (0.1751)  | 0.0105(0.0018)      | 0.0370(0.0224)      | 0.0216(0.0072)      | 0.0176(0.0048)      | -                   | 0.0037(0.0001)      | 0.0228(0.0081)      | 0.0229(0.0081)      |
| $\nu_{74}$ (0.1793)  | 0.0026(0.0001)      | 0.0174(0.0047)      | 0.0158(0.0037)      | 0.0136(0.0028)      | -                   | 0.0076(0.0009)      | 0.0444(0.0295)      | 0.0506(0.0384)      |
| $\nu_{75}$ (0.1828)  | -                   | 0.0334(0.0167)      | 0.0152(0.0034)      | 0.0142(0.0030)      | -                   | 0.0097(0.0014)      | 0.0608(0.0382)      | 0.0583(0.0503)      |
| $\nu_{77}$ (0.1839)  | -                   | 0.0401(0.0237)      | 0.0592(0.0496)      | 0.0577(0.0471)      | -                   | 0.0084(0.0010)      | 0.0579(0.0474)      | 0.0620(0.0544)      |
| $\nu_{80}$ (0.1880)  | 0.0055(0.0004)      | 0.0433(0.0265)      | 0.0324(0.0144)      | 0.0317(0.0138)      | -                   | 0.0084(0.0010)      | 0.0579(0.0474)      | 0.0620(0.0544)      |
| $\nu_{81}$ (0.1909)  | -                   | 0.0598(0.0490)      | 0.0324(0.0144)      | 0.0317(0.0138)      | -                   | 0.0159(0.0035)      | 0.0668(0.0612)      | 0.0759(0.0789)      |
| $\nu_{83}$ (0.2003)  | 0.0304(0.0115)      | 0.0911(0.1033)      | 0.0719(0.0645)      | 0.0768(0.0736)      | -                   | 0.0234(0.0068)      | 0.0429(0.0261)      | 0.0528(0.0854)      |
| $\nu_{85}$ (0.2040)  | 0.0045(0.0002)      | 0.0486(0.0284)      | 0.0320(0.0123)      | 0.0511(0.0314)      | -                   | 0.0098(0.0012)      | 0.0429(0.0261)      | 0.0528(0.0854)      |
| $\nu_{87}$ (0.2172)  | -                   | 0.1243(0.1637)      | 0.0827(0.0726)      | 0.0793(0.0570)      | 0.0174(0.0032)      | 0.0432(0.0198)      | 0.1098(0.1277)      | 0.1169(0.1449)      |
| $\nu_{89}$ (0.3765)  | 0.0036(0.0001)      | 0.0157(0.0009)      | -                   | -                   | -                   | 0.0023(0.0001)      | 0.0136(0.0006)      | 0.0080(0.0002)      |
| $\nu_{92}$ (0.3847)  | 0.0038(0.0001)      | 0.0105(0.0004)      | -                   | -                   | -                   | 0.0011(0.0001)      | -                   | -                   |
| $\nu_{93}$ (0.3889)  | 0.0060(0.0001)      | 0.0205(0.0014)      | 0.0097(0.0003)      | 0.0172(0.0010)      | -                   | 0.0030(0.0001)      | 0.0154(0.0008)      | 0.0167(0.0009)      |
| $\nu_{95}$ (0.3927)  | -                   | 0.0026(0.0001)      | 0.0153(0.0008)      | 0.0153(0.0008)      | -                   | 0.0006(0.0001)      | 0.0113(0.0004)      | 0.0133(0.0006)      |
| $\nu_{98}$ (0.3933)  | -                   | 0.0040(0.0001)      | 0.0134(0.0006)      | 0.0071(0.0002)      | -                   | 0.0009(0.0001)      | 0.0115(0.0004)      | 0.0108(0.0004)      |
| $\nu_{101}$ (0.3999) | -                   | 0.0053(0.0001)      | 0.0187(0.0011)      | 0.0148(0.0007)      | -                   | 0.0008(0.0001)      | 0.0172(0.0009)      | 0.0138(0.0006)      |

**Table S12:** Linear intrastate coupling parameters ( $\kappa$ ) for triplet electronic states of **AP2** obtained at B3LYP/6-311G(d,p) level of theory. Coupling strength ( $\kappa^2/2\omega^2$ ) obtained for each vibrational mode is shown in paranthesis.

| A mode<br>(Freq, eV) | $\kappa^{T1}$   | $\kappa^{T2}$   | $\kappa^{T3}$   | $\kappa^{T4}$   | $\kappa^{T5}$   | $\kappa^{T6}$   |
|----------------------|-----------------|-----------------|-----------------|-----------------|-----------------|-----------------|
| $\nu_1$ (0.0060)     | 0.0135(2.5313)  | 0.0194(5.2272)  | 0.0269(10.0501) | 0.0303(12.7513) | 0.0072(0.7200)  | 0.0038(0.2006)  |
| $\nu_3$ (0.0077)     | 0.0061(0.3138)  | 0.0143(1.7245)  | 0.0176(2.6122)  | 0.0182(2.7934)  | 0.0077(0.5000)  | 0.0012(0.0121)  |
| $\nu_6$ (0.0181)     | -0.0042(0.0269) | -0.0050(0.0382) | 0.0049(0.0366)  | 0.0058(0.0513)  | -0.0007(0.0007) | 0.0111(0.1880)  |
| $\nu_7$ (0.0208)     | 0.0010(0.0012)  | 0.0098(0.1110)  | 0.0117(0.1582)  | 0.0114(0.1502)  | 0.0006(0.0004)  | 0.0006(0.0004)  |
| $\nu_{10}$ (0.0233)  | 0.0043(0.0170)  | -0.0033(0.0100) | -0.0060(0.0332) | -0.0008(0.0006) | -0.0059(0.0321) | -0.0083(0.0634) |
| $\nu_{12}$ (0.0331)  | -0.0008(0.0003) | 0.0100(0.0456)  | 0.0023(0.0024)  | -0.0039(0.0069) | 0.0009(0.0004)  | 0.0033(0.0050)  |
| $\nu_{15}$ (0.0383)  | 0.0220(0.1650)  | -0.0113(0.0435) | -0.0068(0.0158) | 0.0075(0.0192)  | 0.0209(0.1489)  | 0.0138(0.0649)  |
| $\nu_{17}$ (0.0453)  | -0.0240(0.1403) | 0.0033(0.0027)  | -0.0024(0.0014) | -0.0051(0.0063) | -0.0249(0.1511) | -0.0118(0.0339) |
| $\nu_{18}$ (0.0526)  | -0.0339(0.2077) | -0.0089(0.0143) | -0.0059(0.0063) | 0.0121(0.0265)  | -0.0294(0.1562) | -0.0248(0.1111) |
| $\nu_{20}$ (0.0601)  | 0.0168(0.0391)  | 0.0076(0.0080)  | 0.0176(0.0429)  | -0.0171(0.0405) | 0.0156(0.0337)  | 0.0124(0.0213)  |
| $\nu_{24}$ (0.0661)  | 0.0094(0.0101)  | 0.0027(0.0008)  | -0.0032(0.0012) | -0.0328(0.1231) | -0.0027(0.0008) | 0.0111(0.0141)  |
| $\nu_{26}$ (0.0689)  | 0.0054(0.0031)  | 0.0074(0.0058)  | -0.0153(0.0247) | 0.0096(0.0097)  | 0.0032(0.0011)  | -0.0084(0.0074) |
| $\nu_{28}$ (0.0733)  | -0.0007(0.0001) | 0.0007(0.0001)  | 0.0130(0.0157)  | -0.0025(0.0006) | -0.0133(0.0165) | -0.0134(0.0167) |
| $\nu_{30}$ (0.0802)  | -0.0026(0.0005) | 0.0155(0.0187)  | 0.0032(0.0008)  | -0.0117(0.0106) | 0.0024(0.0004)  | 0.0136(0.0144)  |
| $\nu_{32}$ (0.0822)  | -0.0006(0.0001) | 0.0265(0.0520)  | 0.0419(0.1299)  | 0.0252(0.0470)  | 0.0229(0.0388)  | 0.0385(0.1097)  |
| $\nu_{34}$ (0.0877)  | 0.0100(0.0065)  | 0.0174(0.0197)  | 0.0138(0.0124)  | 0.0042(0.0011)  | -0.0006(0.0001) | 0.0122(0.0097)  |
| $\nu_{35}$ (0.0892)  | -0.0005(0.0001) | 0.0035(0.0008)  | 0.0029(0.0005)  | -0.0030(0.0006) | 0.0097(0.0059)  | 0.0050(0.0016)  |
| $\nu_{38}$ (0.1026)  | 0.0081(0.0031)  | -0.0050(0.0012) | 0.0009(0.0001)  | 0.0094(0.0042)  | 0.0018(0.0002)  | 0.0023(0.0003)  |
| $\nu_{40}$ (0.1031)  | 0.0070(0.0023)  | -0.0057(0.0015) | -0.0008(0.0001) | -0.0051(0.0012) | 0.0116(0.0063)  | 0.0023(0.0002)  |
| $\nu_{43}$ (0.1074)  | 0.0013(0.0001)  | 0.0219(0.0208)  | 0.0137(0.0081)  | 0.0285(0.0352)  | 0.0191(0.0158)  | -0.0106(0.0049) |
| $\nu_{44}$ (0.1138)  | -0.0040(0.0006) | 0.0002(0.0001)  | 0.0006(0.0001)  | -0.0019(0.0001) | 0.0004(0.0001)  | -0.0013(0.0001) |
| $\nu_{46}$ (0.1210)  | 0.0072(0.0018)  | -0.0033(0.0004) | -0.0008(0.0001) | 0.0161(0.0089)  | 0.0066(0.0015)  | -0.0088(0.0026) |
| $\nu_{48}$ (0.1224)  | 0.0027(0.0002)  | 0.0023(0.0002)  | 0.0020(0.0001)  | 0.0039(0.0005)  | 0.0126(0.0053)  | -0.0013(0.0001) |
| $\nu_{52}$ (0.1282)  | -0.0130(0.0051) | -0.0223(0.0151) | -0.0158(0.0076) | -0.0010(0.0001) | -0.0055(0.0009) | 0.0043(0.0006)  |
| $\nu_{54}$ (0.1314)  | -0.0055(0.0009) | 0.0002(0.0001)  | -0.0144(0.0060) | -0.0038(0.0004) | 0.0136(0.0054)  | -0.0077(0.0017) |
| $\nu_{55}$ (0.1369)  | -0.0217(0.0126) | -0.0079(0.0017) | 0.0119(0.0038)  | -0.0153(0.0062) | 0.0029(0.0002)  | -0.0245(0.0160) |
| $\nu_{57}$ (0.1446)  | -0.0557(0.0742) | 0.0063(0.0009)  | 0.0225(0.0121)  | 0.0170(0.0069)  | -0.0224(0.0120) | -0.0166(0.0066) |
| $\nu_{59}$ (0.1480)  | 0.0074(0.0013)  | 0.0157(0.0056)  | -0.0017(0.0001) | 0.0101(0.0023)  | -0.0448(0.0458) | 0.0002(0.0001)  |
| $\nu_{64}$ (0.1574)  | 0.1447(0.4226)  | 0.0863(0.1503)  | 0.0782(0.1234)  | 0.0914(0.1686)  | 0.0381(0.0293)  | 0.0673(0.0914)  |
| $\nu_{65}$ (0.1584)  | 0.0214(0.0091)  | 0.0537(0.0575)  | 0.0526(0.0551)  | 0.0446(0.0396)  | 0.0414(0.0342)  | 0.0004(0.0001)  |
| $\nu_{67}$ (0.1694)  | 0.0145(0.0037)  | -0.0176(0.0054) | -0.0379(0.0250) | -0.0089(0.0014) | 0.0363(0.0230)  | 0.0145(0.0037)  |
| $\nu_{68}$ (0.1718)  | -0.0458(0.0355) | -0.0262(0.0116) | -0.0244(0.0101) | -0.0364(0.0224) | -0.0051(0.0004) | -0.0203(0.0070) |
| $\nu_{70}$ (0.1727)  | -0.0809(0.1097) | -0.0080(0.0011) | 0.0178(0.0053)  | -0.0305(0.0156) | -0.0253(0.0107) | -0.0524(0.0460) |
| $\nu_{73}$ (0.1790)  | 0.0367(0.0210)  | 0.0300(0.0140)  | 0.0197(0.0061)  | 0.0383(0.0229)  | 0.0427(0.0285)  | 0.0609(0.0579)  |
| $\nu_{76}$ (0.1829)  | 0.0012(0.0001)  | 0.0051(0.0004)  | 0.0119(0.0021)  | 0.0056(0.0005)  | 0.0030(0.0001)  | 0.0093(0.0013)  |
| $\nu_{78}$ (0.1840)  | -0.0118(0.0021) | -0.0127(0.0024) | -0.0209(0.0065) | -0.0103(0.0016) | 0.0011(0.0001)  | -0.0033(0.0002) |
| $\nu_{79}$ (0.1847)  | -0.0161(0.0038) | 0.0124(0.0023)  | 0.0046(0.0003)  | 0.0110(0.0018)  | 0.0056(0.0005)  | -0.0131(0.0025) |
| $\nu_{82}$ (0.1926)  | 0.0637(0.0547)  | 0.0203(0.0056)  | 0.0288(0.0112)  | 0.0002(0.0001)  | -0.0344(0.0160) | -0.0555(0.0415) |
| $\nu_{84}$ (0.2012)  | 0.0451(0.0251)  | 0.0292(0.0105)  | 0.0211(0.0055)  | 0.0323(0.0129)  | 0.0733(0.0664)  | 0.0245(0.0074)  |
| $\nu_{86}$ (0.2065)  | -0.2143(0.5385) | -0.0404(0.0191) | -0.0550(0.0355) | -0.0200(0.0047) | -0.1263(0.1870) | -0.0458(0.0246) |
| $\nu_{88}$ (0.2177)  | -0.0181(0.0035) | -0.1323(0.1847) | -0.1994(0.4197) | -0.0758(0.0606) | -0.0102(0.0011) | -0.0140(0.0021) |
| $\nu_{90}$ (0.3765)  | 0.0021(0.0001)  | 0.0007(0.0001)  | 0.0027(0.0001)  | 0.0019(0.0001)  | 0.0023(0.0001)  | 0.0038(0.0001)  |
| $\nu_{91}$ (0.3847)  | 0.0005(0.0001)  | -0.0009(0.0001) | -0.0010(0.0001) | 0.0002(0.0001)  | -0.0011(0.0001) | -0.0009(0.0001) |
| $\nu_{94}$ (0.3889)  | -0.0005(0.0001) | 0.0079(0.0002)  | 0.0100(0.0003)  | 0.0025(0.0001)  | -0.0003(0.0001) | -0.0005(0.0001) |
| $\nu_{95}$ (0.3922)  | 0.0046(0.0001)  | 0.0035(0.0001)  | 0.0016(0.0001)  | 0.0061(0.0001)  | -0.0035(0.0001) | -0.0057(0.0001) |
| $\nu_{97}$ (0.3929)  | -0.0082(0.0002) | -0.0052(0.0001) | -0.0022(0.0001) | -0.0074(0.0002) | -0.0168(0.0009) | 0.0005(0.0001)  |
| $\nu_{99}$ (0.3954)  | 0.0061(0.0001)  | 0.0010(0.0001)  | -0.0004(0.0001) | 0.0046(0.0001)  | 0.0033(0.0001)  | 0.0099(0.0003)  |
| $\nu_{100}$ (0.3983) | -0.0021(0.0001) | -0.0020(0.0001) | -0.0028(0.0001) | 0.0022(0.0001)  | -0.0028(0.0001) | -0.0186(0.0011) |
| $\nu_{102}$ (0.3999) | -0.0025(0.0001) | 0.0008(0.0001)  | 0.0016(0.0001)  | -0.0017(0.0001) | -0.0138(0.0006) | -0.0051(0.0001) |

**Table S13:** Linear interstate coupling parameters ( $\lambda$ ) for triplet electronic states of **AP2** obtained at B3LYP/6-311G(d,p) level of theory. Coupling strength ( $\lambda^2/2\omega^2$ ) obtained for each vibrational mode is shown in paranthesis.

| B mode              | $\lambda_{T_1-T_2}$ | $\lambda_{T_1-T_4}$ | $\lambda_{T_1-T_5}$ | $\lambda_{T_1-T_6}$ | $\lambda_{T_2-T_3}$ | $\lambda_{T_3-T_4}$ | $\lambda_{T_3-T_5}$ | $\lambda_{T_3-T_6}$ |
|---------------------|---------------------|---------------------|---------------------|---------------------|---------------------|---------------------|---------------------|---------------------|
| $\nu_2(0.0062)$     | -                   | -                   | 0.0217(6.1250)      | -                   | -                   | 0.0157(3.2062)      | 0.0368(17.6150)     | 0.0353(16.2082)     |
| $\nu_4(0.0080)$     | 0.0280(6.1250)      | 0.0377(11.1038)     | 0.0283(6.2570)      | 0.0255(5.0801)      | -                   | 0.0074(0.4278)      | 0.0052(0.2113)      | -                   |
| $\nu_5(0.0156)$     | 0.0243(1.2132)      | 0.0196(0.7893)      | -                   | -                   | -                   | 0.0082(0.1381)      | 0.0126(0.3262)      | -                   |
| $\nu_8(0.0214)$     | 0.0136(0.2019)      | 0.0201(0.4411)      | -                   | -                   | -                   | 0.0079(0.0681)      | -                   | -                   |
| $\nu_9(0.0217)$     | 0.0208(0.4594)      | 0.0508(2.7402)      | -                   | -                   | -                   | 0.0158(0.2651)      | 0.0159(0.2684)      | 0.0152(0.2453)      |
| $\nu_{11}(0.0285)$  | 0.0098(0.0591)      | 0.0224(0.3089)      | -                   | -                   | -                   | 0.0076(0.0356)      | -                   | -                   |
| $\nu_{13}(0.0336)$  | 0.0424(0.7962)      | 0.0530(1.2441)      | -                   | -                   | -                   | 0.0114(0.0576)      | -                   | -                   |
| $\nu_{14}(0.0372)$  | -                   | 0.0243(0.2134)      | -                   | -                   | 0.0136(0.0668)      | -                   | -                   | -                   |
| $\nu_{16}(0.0429)$  | -                   | -                   | 0.0237(0.1526)      | -                   | 0.0186(0.0940)      | -                   | -                   | -                   |
| $\nu_{19}(0.0538)$  | 0.0118(0.0241)      | 0.0305(0.1607)      | 0.0212(0.0776)      | -                   | 0.0124(0.0266)      | -                   | -                   | -                   |
| $\nu_{21}(0.0609)$  | 0.0183(0.0451)      | 0.0220(0.0653)      | -                   | -                   | 0.0058(0.0045)      | -                   | -                   | -                   |
| $\nu_{22}(0.0631)$  | 0.0212(0.0564)      | 0.0249(0.0779)      | -                   | -                   | -                   | -                   | -                   | -                   |
| $\nu_{23}(0.0635)$  | 0.0444(0.2444)      | 0.0462(0.2647)      | -                   | -                   | 0.0042(0.0022)      | -                   | -                   | -                   |
| $\nu_{25}(0.0662)$  | 0.0257(0.0754)      | 0.0445(0.2259)      | -                   | -                   | 0.0078(0.0075)      | -                   | -                   | -                   |
| $\nu_{27}(0.0699)$  | -                   | 0.0546(0.3051)      | 0.0295(0.0891)      | -                   | -                   | 0.0100(0.0114)      | 0.0386(0.1525)      | 0.0361(0.1334)      |
| $\nu_{29}(0.0777)$  | -                   | 0.0446(0.1647)      | -                   | -                   | -                   | 0.0133(0.0146)      | 0.0079(0.0052)      | 0.0097(0.0078)      |
| $\nu_{31}(0.0810)$  | -                   | -                   | -                   | -                   | 0.0103(0.0039)      | -                   | 0.0062(0.0029)      | 0.0083(0.0052)      |
| $\nu_{33}(0.0877)$  | 0.0066(0.0028)      | 0.0335(0.0730)      | -                   | -                   | 0.0101(0.0062)      | 0.0097(0.0061)      | -                   | 0.0105(0.0072)      |
| $\nu_{36}(0.0910)$  | -                   | -                   | -                   | -                   | 0.0665(0.0023)      | -                   | -                   | -                   |
| $\nu_{37}(0.0956)$  | 0.0437(0.1045)      | 0.0502(0.1379)      | 0.0354(0.0686)      | -                   | 0.0017(0.0002)      | -                   | -                   | -                   |
| $\nu_{39}(0.1030)$  | 0.0205(0.0198)      | -                   | -                   | -                   | 0.0118(0.0066)      | -                   | -                   | -                   |
| $\nu_{41}(0.1045)$  | -                   | 0.0243(0.0270)      | 0.0189(0.0164)      | -                   | -                   | -                   | -                   | -                   |
| $\nu_{42}(0.1062)$  | 0.0335(0.0498)      | 0.0313(0.0434)      | -                   | -                   | 0.0096(0.0041)      | -                   | -                   | -                   |
| $\nu_{45}(0.1180)$  | -                   | 0.0513(0.0945)      | -                   | -                   | 0.0121(0.0053)      | -                   | -                   | -                   |
| $\nu_{47}(0.1216)$  | 0.0402(0.0546)      | 0.0422(0.0602)      | -                   | -                   | 0.0075(0.0019)      | 0.0142(0.0072)      | -                   | -                   |
| $\nu_{49}(0.1251)$  | 0.0381(0.0479)      | 0.0355(0.0416)      | -                   | -                   | 0.0016(0.0001)      | -                   | -                   | -                   |
| $\nu_{50}(0.1259)$  | 0.0218(0.0155)      | -                   | -                   | -                   | 0.0023(0.0002)      | -                   | -                   | -                   |
| $\nu_{51}(0.1263)$  | -                   | -                   | 0.0142(0.0063)      | 0.0217(0.0148)      | 0.0124(0.0048)      | -                   | -                   | -                   |
| $\nu_{53}(0.1289)$  | -                   | -                   | 0.0159(0.0076)      | -                   | -                   | 0.0109(0.0036)      | 0.0249(0.0187)      | 0.0234(0.0165)      |
| $\nu_{56}(0.1405)$  | 0.0264(0.0177)      | 0.0366(0.0339)      | -                   | -                   | 0.0036(0.0003)      | 0.0039(0.0004)      | -                   | -                   |
| $\nu_{58}(0.1470)$  | -                   | 0.0120(0.0033)      | -                   | 0.0207(0.0099)      | -                   | 0.0108(0.0027)      | -                   | 0.0226(0.0118)      |
| $\nu_{60}(0.1488)$  | -                   | 0.0459(0.0476)      | 0.0242(0.0132)      | -                   | -                   | 0.0164(0.0061)      | 0.0230(0.0119)      | 0.0170(0.0065)      |
| $\nu_{61}(0.1502)$  | -                   | 0.0616(0.0841)      | -                   | -                   | -                   | 0.0288(0.0184)      | 0.0413(0.0378)      | 0.0202(0.0090)      |
| $\nu_{62}(0.1541)$  | -                   | 0.0695(0.1017)      | -                   | -                   | 0.0354(0.0264)      | 0.0176(0.0065)      | -                   | -                   |
| $\nu_{63}(0.1556)$  | -                   | 0.0630(0.0820)      | -                   | 0.0416(0.0314)      | 0.0217(0.0097)      | 0.0178(0.0065)      | 0.0116(0.0028)      | -                   |
| $\nu_{66}(0.1659)$  | -                   | 0.0318(0.0184)      | -                   | -                   | -                   | 0.0186(0.0063)      | 0.0285(0.0148)      | 0.0390(0.0276)      |
| $\nu_{69}(0.1719)$  | -                   | 0.0384(0.0250)      | -                   | -                   | -                   | 0.0155(0.0041)      | 0.0215(0.0078)      | 0.0217(0.0080)      |
| $\nu_{71}(0.1730)$  | 0.0569(0.0541)      | 0.0830(0.1151)      | -                   | 0.0468(0.0366)      | -                   | 0.0212(0.0075)      | -                   | 0.0168(0.0047)      |
| $\nu_{72}(0.1751)$  | 0.0412(0.0277)      | 0.0536(0.0469)      | 0.0524(0.0448)      | 0.0680(0.0754)      | 0.0099(0.0016)      | 0.0099(0.0016)      | 0.0141(0.0031)      | 0.0181(0.0053)      |
| $\nu_{74}(0.1793)$  | 0.0242(0.0091)      | 0.0307(0.0147)      | 0.0467(0.0539)      | 0.0426(0.0282)      | 0.0062(0.0006)      | -                   | 0.0099(0.0015)      | 0.0102(0.0016)      |
| $\nu_{75}(0.1828)$  | -                   | 0.0135(0.0027)      | 0.0154(0.0035)      | -                   | -                   | 0.0053(0.0004)      | 0.0114(0.0019)      | 0.0093(0.0013)      |
| $\nu_{77}(0.1850)$  | -                   | 0.0122(0.0022)      | 0.0151(0.0034)      | -                   | -                   | 0.0061(0.0006)      | 0.0114(0.0019)      | 0.0132(0.0026)      |
| $\nu_{80}(0.1880)$  | 0.0654(0.0605)      | 0.0806(0.0919)      | 0.1248(0.2203)      | 0.0293(0.0121)      | 0.0249(0.0088)      | -                   | 0.0308(0.0134)      | -                   |
| $\nu_{81}(0.1909)$  | -                   | 0.0817(0.0916)      | -                   | -                   | 0.0283(0.0110)      | 0.0141(0.0027)      | -                   | -                   |
| $\nu_{83}(0.2003)$  | 0.0986(0.1212)      | 0.1374(0.2353)      | -                   | 0.1064(0.1411)      | -                   | 0.0230(0.0066)      | -                   | -                   |
| $\nu_{85}(0.2040)$  | 0.0319(0.0122)      | 0.0357(0.0153)      | 0.0487(0.0285)      | -                   | 0.0441(0.0234)      | -                   | 0.0389(0.0160)      | 0.0251(0.0067)      |
| $\nu_{87}(0.2172)$  | -                   | 0.2133(0.4822)      | 0.0375(0.0149)      | -                   | 0.0935(0.0327)      | 0.0668(0.0473)      | 0.0080(0.0002)      | 0.0080(0.0002)      |
| $\nu_{89}(0.3765)$  | -                   | -                   | 0.0212(0.0016)      | -                   | -                   | 0.0039(0.0001)      | 0.0095(0.0003)      | 0.0123(0.0005)      |
| $\nu_{92}(0.3847)$  | -                   | -                   | 0.0181(0.0011)      | -                   | -                   | 0.0046(0.0001)      | 0.0108(0.0004)      | -                   |
| $\nu_{93}(0.3886)$  | 0.0118(0.0005)      | 0.0213(0.0015)      | -                   | -                   | 0.0076(0.0002)      | -                   | -                   | -                   |
| $\nu_{96}(0.3927)$  | 0.0086(0.0002)      | 0.0161(0.0008)      | 0.0156(0.0008)      | 0.0241(0.0019)      | -                   | 0.0023(0.0001)      | 0.0022(0.0001)      | 0.0080(0.0002)      |
| $\nu_{98}(0.3933)$  | 0.0094(0.0003)      | 0.0135(0.0006)      | 0.0174(0.0010)      | 0.0168(0.0009)      | 0.0021(0.0001)      | 0.0015(0.0001)      | 0.0040(0.0001)      | 0.0048(0.0001)      |
| $\nu_{101}(0.3999)$ | 0.0070(0.0002)      | 0.0148(0.0007)      | -                   | 0.0148(0.0007)      | 0.0022(0.0001)      | 0.0023(0.0001)      | -                   | 0.0042(0.0001)      |

**Table S14:** Linear intrastate coupling parameters ( $\kappa$ ) for singlet electronic states of **AP4** obtained at B3LYP/6-311G(d,p) level of theory. Coupling strength ( $\kappa^2/2\omega^2$ ) obtained for each vibrational mode is shown in paranthesis.

| AG mode<br>(Freq, eV) | $\kappa^{S1}$   | $\kappa^{S2}$   | $\kappa^{S3}$    | $\kappa^{S4}$    | $\kappa^{S5}$    | $\kappa^{S6}$    |
|-----------------------|-----------------|-----------------|------------------|------------------|------------------|------------------|
| $\nu_3$ (0.0065)      | -0.0171(3.4605) | -0.0286(9.6800) | -0.0357(15.0846) | -0.0419(20.7720) | -0.0420(20.8525) | -0.0332(13.0098) |
| $\nu_7$ (0.0098)      | -0.0080(0.3332) | -0.0035(0.0638) | -0.0089(0.4116)  | -0.0042(0.0934)  | -0.0014(0.0105)  | -0.0041(0.0858)  |
| $\nu_{10}$ (0.0179)   | -0.0086(0.1154) | -0.0068(0.0722) | -0.0062(0.0606)  | -0.0048(0.0360)  | -0.0043(0.0294)  | -0.0002(0.0001)  |
| $\nu_{15}$ (0.0212)   | -0.0019(0.0040) | 0.0098(0.1068)  | 0.0110(0.1339)   | 0.0126(0.1768)   | 0.0124(0.1722)   | 0.0097(0.1053)   |
| $\nu_{20}$ (0.0338)   | -0.0033(0.0048) | -0.0005(0.0001) | 0.0133(0.0778)   | 0.0217(0.2068)   | 0.0068(0.0203)   | 0.0034(0.0051)   |
| $\nu_{22}$ (0.0343)   | 0.0131(0.0729)  | -0.0011(0.0005) | 0.0013(0.0007)   | -0.0024(0.0024)  | -0.0029(0.0035)  | 0.0093(0.0365)   |
| $\nu_{29}$ (0.0482)   | 0.0233(0.1168)  | 0.0115(0.0285)  | 0.0187(0.0756)   | 0.0141(0.0425)   | 0.0113(0.0273)   | 0.0038(0.0030)   |
| $\nu_{32}$ (0.0620)   | 0.0228(0.0676)  | 0.0118(0.0181)  | 0.0146(0.0278)   | 0.0173(0.0390)   | 0.0079(0.0081)   | -0.0274(0.0975)  |
| $\nu_{37}$ (0.0687)   | -0.0116(0.0143) | -0.0001(0.0001) | 0.0123(0.0160)   | 0.0205(0.0447)   | 0.0272(0.0782)   | 0.0072(0.0055)   |
| $\nu_{40}$ (0.0733)   | -0.0034(0.0011) | 0.0140(0.0182)  | 0.0321(0.0962)   | 0.0312(0.0903)   | 0.0312(0.0909)   | 0.0007(0.0001)   |
| $\nu_{45}$ (0.0830)   | -0.0071(0.0037) | -0.0259(0.0487) | -0.0231(0.0387)  | -0.0289(0.0608)  | -0.0237(0.0409)  | -0.0200(0.0290)  |
| $\nu_{47}$ (0.0843)   | 0.0052(0.0019)  | -0.0004(0.0001) | 0.0056(0.0022)   | 0.0064(0.0028)   | 0.0046(0.0015)   | 0.0163(0.0188)   |
| $\nu_{55}$ (0.1038)   | 0.0067(0.0021)  | -0.0047(0.0010) | 0.0031(0.0004)   | 0.0053(0.0013)   | 0.0122(0.0069)   | 0.0124(0.0071)   |
| $\nu_{58}$ (0.1152)   | -0.0003(0.0001) | -0.0117(0.0052) | -0.0002(0.0001)  | -0.0118(0.0053)  | -0.0039(0.0006)  | -0.0168(0.0106)  |
| $\nu_{62}$ (0.1222)   | 0.0024(0.0002)  | 0.0116(0.0045)  | 0.0149(0.0074)   | 0.0132(0.0059)   | 0.0214(0.0153)   | 0.0112(0.0042)   |
| $\nu_{69}$ (0.1285)   | -0.0185(0.0104) | -0.0134(0.0054) | -0.0148(0.0066)  | -0.0117(0.0042)  | -0.0036(0.0004)  | 0.0042(0.0005)   |
| $\nu_{73}$ (0.1405)   | 0.0377(0.0360)  | -0.0078(0.0015) | -0.0321(0.0261)  | -0.0329(0.0273)  | -0.0293(0.0218)  | 0.0060(0.0009)   |
| $\nu_{77}$ (0.1497)   | 0.0100(0.0022)  | 0.0299(0.0199)  | 0.0215(0.0103)   | 0.0196(0.0086)   | 0.0195(0.0085)   | 0.0331(0.0244)   |
| $\nu_{82}$ (0.1582)   | -0.0994(0.1974) | -0.1051(0.2207) | -0.1074(0.2306)  | -0.1203(0.2891)  | -0.1223(0.2989)  | -0.0982(0.1929)  |
| $\nu_{85}$ (0.1698)   | 0.0406(0.0286)  | 0.0250(0.0108)  | 0.0102(0.0018)   | -0.0096(0.0016)  | -0.0025(0.0001)  | 0.0299(0.0155)   |
| $\nu_{86}$ (0.1718)   | 0.0592(0.0594)  | 0.0438(0.0325)  | 0.0358(0.0217)   | 0.0478(0.0387)   | 0.0430(0.0314)   | 0.0610(0.0630)   |
| $\nu_{91}$ (0.1723)   | -0.0103(0.0018) | 0.0162(0.0044)  | 0.0336(0.0190)   | 0.0361(0.0219)   | 0.0357(0.0215)   | 0.0032(0.0002)   |
| $\nu_{98}$ (0.1830)   | 0.0032(0.0002)  | -0.0042(0.0003) | -0.0085(0.0011)  | -0.0111(0.0019)  | -0.0094(0.0013)  | -0.0048(0.0003)  |
| $\nu_{102}$ (0.1841)  | -0.0077(0.0009) | -0.0185(0.0050) | -0.0290(0.0124)  | -0.0312(0.0144)  | -0.0277(0.0113)  | -0.0084(0.0010)  |
| $\nu_{105}$ (0.1901)  | 0.0438(0.0265)  | 0.0084(0.0010)  | 0.0333(0.0153)   | 0.0293(0.0119)   | 0.0282(0.0110)   | -0.0374(0.0194)  |
| $\nu_{110}$ (0.2057)  | 0.1369(0.2215)  | 0.0685(0.0554)  | 0.0947(0.1060)   | 0.0912(0.0982)   | 0.1031(0.1256)   | 0.0226(0.0060)   |
| $\nu_{114}$ (0.2183)  | -0.0484(0.0246) | -0.0700(0.0514) | -0.0850(0.0757)  | -0.1099(0.1267)  | -0.1197(0.1504)  | -0.0371(0.0144)  |
| $\nu_{118}$ (0.3766)  | 0.0062(0.0001)  | -0.0028(0.0001) | -0.0039(0.0001)  | -0.0022(0.0001)  | -0.0029(0.0001)  | 0.0015(0.0001)   |
| $\nu_{121}$ (0.3848)  | -0.0011(0.0001) | -0.0004(0.0001) | -0.0010(0.0001)  | -0.0015(0.0001)  | 0.0004(0.0001)   | -0.0009(0.0001)  |
| $\nu_{126}$ (0.3890)  | 0.0010(0.0001)  | -0.0060(0.0001) | -0.0068(0.0002)  | -0.0064(0.0001)  | -0.0068(0.0002)  | -0.0001(0.0001)  |
| $\nu_{128}$ (0.3984)  | 0.0023(0.0001)  | 0.0018(0.0001)  | 0.0004(0.0001)   | 0.0004(0.0001)   | 0.0016(0.0001)   | 0.0031(0.0001)   |
| $\nu_{132}$ (0.4005)  | -0.0036(0.0001) | -0.0013(0.0001) | 0.0001(0.0001)   | 0.0003(0.0001)   | -0.0005(0.0001)  | -0.0042(0.0001)  |

**Table S15:** Linear interstate coupling parameters ( $\lambda$ ) for singlet electronic states of AP4 obtained at B3LYP/6-311G(d,p) level of theory. Coupling strength ( $\lambda^2/2\omega^2$ ) obtained for each vibrational mode is shown in paranthesis.

| Vibrational mode<br>(Freq. eV) | $\lambda_{S_1-S_2}$ | $\lambda_{S_1-S_3}$ | $\lambda_{S_1-S_4}$ | $\lambda_{S_1-S_5}$ | $\lambda_{S_2-S_3}$ | $\lambda_{S_2-S_4}$ | $\lambda_{S_2-S_5}$ | $\lambda_{S_3-S_4}$ | $\lambda_{S_3-S_5}$ | $\lambda_{S_3-S_6}$ | $\lambda_{S_4-S_5}$ | $\lambda_{S_4-S_6}$ | $\lambda_{S_5-S_6}$ |
|--------------------------------|---------------------|---------------------|---------------------|---------------------|---------------------|---------------------|---------------------|---------------------|---------------------|---------------------|---------------------|---------------------|---------------------|
| $\nu_1$ (0.0037)               | -                   | -                   | -                   | -                   | 0.0014(0.0732)      | -                   | -                   | -                   | -                   | -                   | 0.0106(4.0958)      | -                   | -                   |
| $\nu_2$ (0.0050)               | -                   | -                   | -                   | -                   | -                   | -                   | -                   | -                   | -                   | -                   | -                   | 0.0097(1.8998)      | -                   |
| $\nu_4$ (0.0065)               | 0.0087(0.8957)      | -                   | 0.0161(3.0718)      | -                   | -                   | -                   | -                   | -                   | 0.0053(0.5535)      | -                   | -                   | -                   | 0.0060(0.4277)      |
| $\nu_5$ (0.0067)               | -                   | 0.0096(1.0216)      | -                   | -                   | -                   | -                   | -                   | -                   | -                   | -                   | -                   | 0.0003(0.0011)      | -                   |
| $\nu_6$ (0.0070)               | -                   | -                   | -                   | -                   | -                   | -                   | -                   | -                   | -                   | -                   | 0.0209(4.4734)      | -                   | -                   |
| $\nu_8$ (0.0128)               | 0.0060(0.1099)      | -                   | 0.0297(2.6895)      | -                   | -                   | -                   | -                   | 0.0128(0.5021)      | -                   | -                   | -                   | -                   | 0.0115(0.4043)      |
| $\nu_9$ (0.0131)               | -                   | 0.0067(0.1327)      | -                   | -                   | -                   | -                   | -                   | -                   | 0.0023(0.0148)      | -                   | -                   | -                   | -                   |
| $\nu_{11}$ (0.0188)            | -                   | -                   | -                   | -                   | -                   | -                   | -                   | -                   | -                   | 0.0061(0.0526)      | -                   | -                   | -                   |
| $\nu_{12}$ (0.0190)            | -                   | 0.0102(0.1452)      | -                   | -                   | -                   | -                   | -                   | -                   | -                   | -                   | 0.0111(0.1433)      | -                   | -                   |
| $\nu_{13}$ (0.0207)            | 0.0061(0.0434)      | -                   | -                   | -                   | 0.0048(0.0268)      | -                   | -                   | -                   | -                   | -                   | -                   | -                   | -                   |
| $\nu_{14}$ (0.0207)            | -                   | -                   | -                   | 0.0108(0.1361)      | -                   | -                   | -                   | 0.0096(0.1070)      | -                   | -                   | -                   | -                   | 0.0030(0.0104)      |
| $\nu_{16}$ (0.0217)            | -                   | -                   | -                   | -                   | -                   | -                   | -                   | -                   | 0.0173(0.3160)      | -                   | -                   | -                   | -                   |
| $\nu_{17}$ (0.0242)            | 0.0051(0.0222)      | -                   | -                   | 0.0097(0.0796)      | -                   | -                   | -                   | 0.0077(0.0508)      | -                   | -                   | -                   | 0.0187(0.3696)      | -                   |
| $\nu_{18}$ (0.0260)            | -                   | -                   | -                   | -                   | 0.0009(0.0006)      | -                   | -                   | -                   | -                   | 0.0081(0.0484)      | -                   | -                   | 0.0015(0.0018)      |
| $\nu_{19}$ (0.0299)            | -                   | 0.0129(0.0929)      | -                   | -                   | -                   | -                   | -                   | -                   | 0.0069(0.0263)      | -                   | -                   | 0.0189(0.2005)      | -                   |
| $\nu_{21}$ (0.0343)            | 0.0087(0.0322)      | -                   | 0.0335(0.4782)      | -                   | -                   | -                   | -                   | -                   | -                   | -                   | -                   | -                   | 0.0125(0.0665)      |
| $\nu_{23}$ (0.0378)            | 0.0176(0.1084)      | -                   | 0.0333(0.3871)      | -                   | -                   | -                   | -                   | 0.0114(0.0452)      | -                   | -                   | -                   | -                   | 0.0020(0.0014)      |
| $\nu_{24}$ (0.0393)            | -                   | 0.0068(0.0151)      | -                   | -                   | -                   | -                   | -                   | -                   | 0.0097(0.0303)      | -                   | -                   | -                   | -                   |
| $\nu_{25}$ (0.0410)            | -                   | -                   | -                   | -                   | 0.0040(0.0046)      | -                   | -                   | -                   | -                   | -                   | 0.0049(0.0071)      | -                   | -                   |
| $\nu_{26}$ (0.0432)            | -                   | 0.0208(0.1156)      | -                   | -                   | -                   | -                   | -                   | -                   | -                   | -                   | -                   | -                   | -                   |
| $\nu_{27}$ (0.0471)            | -                   | -                   | 0.0216(0.1050)      | -                   | 0.0100(0.0227)      | -                   | -                   | -                   | -                   | -                   | 0.0020(0.0009)      | -                   | -                   |
| $\nu_{28}$ (0.0472)            | 0.0236(0.1250)      | -                   | -                   | -                   | -                   | -                   | -                   | 0.0095(0.0204)      | -                   | -                   | -                   | -                   | -                   |
| $\nu_{30}$ (0.0574)            | -                   | 0.0224(0.0765)      | -                   | -                   | 0.0162(0.0397)      | -                   | -                   | -                   | -                   | -                   | 0.0181(0.0444)      | -                   | -                   |
| $\nu_{31}$ (0.0609)            | -                   | -                   | -                   | -                   | 0.0071(0.0068)      | -                   | -                   | 0.0088(0.0096)      | -                   | -                   | -                   | -                   | -                   |
| $\nu_{33}$ (0.0632)            | -                   | -                   | -                   | -                   | -                   | -                   | -                   | -                   | -                   | -                   | -                   | -                   | -                   |
| $\nu_{34}$ (0.0652)            | 0.0122(0.0186)      | -                   | 0.0258(0.0831)      | -                   | -                   | -                   | -                   | -                   | -                   | -                   | -                   | -                   | 0.0028(0.0010)      |
| $\nu_{35}$ (0.0658)            | 0.0242(0.0689)      | -                   | 0.0450(0.2377)      | -                   | -                   | -                   | -                   | -                   | 0.0312(0.1123)      | -                   | -                   | -                   | 0.0076(0.0068)      |
| $\nu_{36}$ (0.0673)            | -                   | -                   | -                   | -                   | -                   | -                   | -                   | -                   | -                   | -                   | -                   | -                   | -                   |
| $\nu_{38}$ (0.0712)            | 0.0036(0.0014)      | -                   | -                   | -                   | -                   | -                   | -                   | -                   | -                   | -                   | -                   | -                   | -                   |
| $\nu_{39}$ (0.0731)            | -                   | -                   | -                   | -                   | -                   | -                   | -                   | -                   | -                   | -                   | -                   | -                   | -                   |
| $\nu_{41}$ (0.0759)            | -                   | -                   | -                   | -                   | -                   | -                   | -                   | -                   | -                   | -                   | -                   | -                   | -                   |
| $\nu_{42}$ (0.0764)            | -                   | 0.0131(0.0149)      | -                   | -                   | -                   | -                   | 0.0207(0.0401)      | -                   | -                   | 0.0044(0.0014)      | -                   | -                   | 0.0174(0.0284)      |
| $\nu_{43}$ (0.0813)            | -                   | -                   | -                   | -                   | 0.0120(0.0108)      | -                   | -                   | -                   | -                   | -                   | -                   | -                   | -                   |
| $\nu_{44}$ (0.0817)            | -                   | -                   | -                   | -                   | -                   | 0.0031(0.0007)      | -                   | -                   | -                   | 0.0139(0.0146)      | -                   | -                   | -                   |
| $\nu_{46}$ (0.0842)            | -                   | -                   | -                   | -                   | -                   | -                   | -                   | -                   | -                   | -                   | -                   | -                   | -                   |
| $\nu_{48}$ (0.0881)            | -                   | -                   | -                   | -                   | 0.0162(0.0168)      | -                   | -                   | -                   | -                   | -                   | 0.0122(0.0096)      | -                   | -                   |
| $\nu_{49}$ (0.0883)            | 0.0102(0.0067)      | -                   | 0.0295(0.0558)      | -                   | -                   | -                   | -                   | 0.0064(0.0026)      | -                   | -                   | -                   | -                   | 0.0105(0.0071)      |
| $\nu_{50}$ (0.0909)            | -                   | -                   | -                   | -                   | 0.0072(0.0032)      | -                   | -                   | -                   | -                   | -                   | 0.0110(0.0073)      | -                   | -                   |
| $\nu_{51}$ (0.0910)            | -                   | -                   | -                   | -                   | -                   | -                   | -                   | -                   | 0.0068(0.0028)      | -                   | -                   | -                   | -                   |
| $\nu_{52}$ (0.0943)            | -                   | -                   | -                   | -                   | 0.0140(0.0118)      | -                   | -                   | -                   | 0.0105(0.0062)      | -                   | -                   | -                   | -                   |
| $\nu_{53}$ (0.1013)            | 0.0098(0.0047)      | 0.0044(0.0011)      | -                   | -                   | 0.0132(0.0099)      | -                   | 0.0052(0.0013)      | 0.0068(0.0023)      | -                   | -                   | -                   | 0.0003(0.0001)      | -                   |
| $\nu_{54}$ (0.1032)            | -                   | -                   | -                   | -                   | -                   | -                   | -                   | -                   | -                   | -                   | 0.0049(0.0011)      | -                   | -                   |
| $\nu_{56}$ (0.1046)            | -                   | 0.0127(0.0074)      | -                   | -                   | -                   | -                   | -                   | -                   | -                   | -                   | -                   | -                   | -                   |
| $\nu_{57}$ (0.1098)            | 0.0090(0.0034)      | -                   | -                   | -                   | -                   | -                   | -                   | -                   | -                   | -                   | -                   | -                   | -                   |
| $\nu_{59}$ (0.1174)            | -                   | 0.0179(0.0116)      | -                   | -                   | -                   | 0.0095(0.0033)      | -                   | -                   | -                   | -                   | -                   | -                   | -                   |
| $\nu_{60}$ (0.1194)            | 0.0106(0.0039)      | -                   | -                   | -                   | -                   | -                   | -                   | -                   | -                   | -                   | -                   | -                   | -                   |
| $\nu_{61}$ (0.1210)            | -                   | -                   | 0.0173(0.0102)      | -                   | 0.0053(0.0010)      | -                   | -                   | -                   | -                   | 0.0063(0.0014)      | -                   | -                   | -                   |
| $\nu_{63}$ (0.1228)            | 0.0135(0.0060)      | -                   | -                   | -                   | -                   | -                   | -                   | -                   | -                   | -                   | -                   | -                   | -                   |
| $\nu_{64}$ (0.1230)            | -                   | -                   | -                   | -                   | 0.0042(0.0006)      | -                   | -                   | -                   | -                   | -                   | 0.0015(0.0001)      | -                   | 0.0051(0.0009)      |
| $\nu_{65}$ (0.1240)            | -                   | 0.0136(0.0060)      | -                   | -                   | -                   | -                   | -                   | -                   | -                   | -                   | -                   | -                   | -                   |
| $\nu_{66}$ (0.1249)            | 0.0187(0.0112)      | -                   | -                   | -                   | -                   | -                   | -                   | -                   | -                   | -                   | -                   | -                   | -                   |
| $\nu_{67}$ (0.1282)            | -                   | -                   | -                   | -                   | 0.0069(0.0014)      | -                   | -                   | -                   | -                   | -                   | 0.0016(0.0001)      | -                   | 0.0080(0.0021)      |
| $\nu_{68}$ (0.1283)            | -                   | 0.0039(0.0005)      | -                   | -                   | -                   | -                   | -                   | -                   | 0.0125(0.0048)      | -                   | -                   | -                   | -                   |
| $\nu_{70}$ (0.1287)            | -                   | 0.0060(0.0011)      | -                   | -                   | -                   | -                   | -                   | -                   | -                   | -                   | -                   | -                   | -                   |
| $\nu_{71}$ (0.1289)            | 0.0050(0.0008)      | -                   | -                   | -                   | -                   | -                   | -                   | -                   | -                   | -                   | -                   | -                   | -                   |
| $\nu_{72}$ (0.1339)            | -                   | -                   | -                   | -                   | 0.0138(0.0053)      | -                   | -                   | -                   | -                   | 0.0173(0.0083)      | -                   | -                   | 0.0079(0.0019)      |
| $\nu_{74}$ (0.1412)            | -                   | -                   | -                   | -                   | -                   | -                   | 0.0043(0.0005)      | 0.0169(0.0072)      | -                   | -                   | -                   | -                   | 0.0062(0.0010)      |
| $\nu_{75}$ (0.1489)            | -                   | -                   | -                   | -                   | -                   | -                   | -                   | -                   | 0.0282(0.0179)      | -                   | -                   | -                   | -                   |
| $\nu_{76}$ (0.1492)            | 0.0059(0.0008)      | -                   | -                   | -                   | -                   | -                   | 0.0166(0.0062)      | 0.0234(0.0123)      | -                   | -                   | -                   | -                   | 0.0116(0.0030)      |
| $\nu_{78}$ (0.1506)            | -                   | -                   | -                   | -                   | -                   | -                   | -                   | -                   | -                   | -                   | -                   | -                   | -                   |
| $\nu_{79}$ (0.1508)            | -                   | -                   | -                   | -                   | -                   | -                   | -                   | -                   | 0.0173(0.0066)      | -                   | -                   | -                   | 0.0160(0.0057)      |
| $\nu_{80}$ (0.1544)            | -                   | -                   | -                   | -                   | -                   | -                   | -                   | -                   | 0.0504(0.0532)      | -                   | -                   | -                   | 0.0244(0.0125)      |





**Table S16:** Linear intrastate coupling parameters ( $\kappa$ ) for triplet electronic states of **AP4** obtained at B3LYP/6-311G(d,p) level of theory. Coupling strength ( $\kappa^2/2\omega^2$ ) obtained for each vibrational mode is shown in paranthesis.

| AG mode<br>(Freq, eV) | $\kappa^{T_1}$  | $\kappa^{T_2}$  | $\kappa^{T_3}$   | $\kappa^{T_4}$   | $\kappa^{T_5}$   | $\kappa^{T_6}$   |
|-----------------------|-----------------|-----------------|------------------|------------------|------------------|------------------|
| $\nu_3(0.0065)$       | -0.0173(3.5567) | -0.0279(9.2053) | -0.0291(10.0145) | -0.0297(10.4659) | -0.0354(14.8680) | -0.0405(19.4491) |
| $\nu_7(0.0098)$       | -0.0030(0.0462) | 0.0035(0.0647)  | -0.0058(0.1762)  | -0.0042(0.0935)  | -0.0017(0.0159)  | -0.0054(0.1505)  |
| $\nu_{10}(0.0179)$    | -0.0096(0.1438) | -0.0071(0.0778) | -0.0044(0.0308)  | -0.0016(0.0038)  | -0.0008(0.0011)  | -0.0015(0.0034)  |
| $\nu_{15}(0.0212)$    | -0.0048(0.0256) | 0.0087(0.0841)  | 0.0090(0.0909)   | 0.0098(0.1068)   | 0.0112(0.1396)   | 0.0103(0.1185)   |
| $\nu_{20}(0.0338)$    | 0.0115(0.0580)  | -0.0152(0.1005) | 0.0024(0.0026)   | -0.0082(0.0298)  | 0.0074(0.0240)   | 0.0091(0.0361)   |
| $\nu_{22}(0.0343)$    | 0.0211(0.1898)  | -0.0030(0.0038) | -0.0015(0.0010)  | -0.0004(0.0001)  | -0.0038(0.0061)  | 0.0069(0.0202)   |
| $\nu_{29}(0.0482)$    | 0.0289(0.1802)  | 0.0036(0.0028)  | 0.0142(0.0434)   | 0.0129(0.0359)   | 0.0075(0.0121)   | 0.0028(0.0017)   |
| $\nu_{32}(0.0620)$    | 0.0314(0.1286)  | 0.0029(0.0011)  | 0.0172(0.0387)   | 0.0178(0.0410)   | 0.0109(0.0154)   | -0.0322(0.1347)  |
| $\nu_{37}(0.0687)$    | -0.0118(0.0148) | -0.0101(0.0108) | 0.0087(0.0080)   | 0.0085(0.0077)   | 0.0241(0.0614)   | 0.0150(0.0239)   |
| $\nu_{40}(0.0733)$    | -0.0017(0.0003) | -0.0021(0.0004) | 0.0204(0.0389)   | 0.0126(0.0148)   | 0.0197(0.0361)   | 0.0093(0.0081)   |
| $\nu_{45}(0.0830)$    | 0.0024(0.0004)  | -0.0239(0.0415) | -0.0247(0.0443)  | -0.0311(0.0701)  | -0.0269(0.0523)  | -0.0145(0.0152)  |
| $\nu_{47}(0.0843)$    | 0.0076(0.0041)  | -0.0014(0.0001) | 0.0023(0.0004)   | 0.0040(0.0011)   | 0.0078(0.0043)   | 0.0212(0.0316)   |
| $\nu_{55}(0.1038)$    | 0.0166(0.0127)  | -0.0066(0.0020) | 0.0007(0.0001)   | 0.0019(0.0002)   | 0.0046(0.0010)   | 0.0115(0.0062)   |
| $\nu_{58}(0.1152)$    | 0.0092(0.0032)  | -0.0305(0.0350) | -0.0061(0.0014)  | -0.0124(0.0058)  | -0.0096(0.0035)  | -0.0175(0.0116)  |
| $\nu_{62}(0.1222)$    | 0.0029(0.0003)  | 0.0095(0.0030)  | 0.0084(0.0024)   | 0.0013(0.0001)   | 0.0117(0.0046)   | 0.0193(0.0125)   |
| $\nu_{69}(0.1285)$    | -0.0185(0.0103) | -0.0126(0.0048) | -0.0172(0.0090)  | -0.0186(0.0105)  | -0.0074(0.0017)  | 0.0033(0.0003)   |
| $\nu_{73}(0.1405)$    | 0.0532(0.0717)  | 0.0104(0.0027)  | -0.0234(0.0139)  | -0.0147(0.0054)  | -0.0293(0.0217)  | -0.0119(0.0036)  |
| $\nu_{77}(0.1497)$    | 0.0131(0.0039)  | 0.0315(0.0221)  | 0.0181(0.0073)   | 0.0113(0.0029)   | 0.0155(0.0054)   | 0.0259(0.0150)   |
| $\nu_{82}(0.1582)$    | -0.1426(0.4065) | -0.1051(0.2207) | -0.0920(0.1691)  | -0.0857(0.1466)  | -0.0976(0.1902)  | -0.0988(0.1950)  |
| $\nu_{85}(0.1698)$    | 0.0689(0.0823)  | 0.0139(0.0034)  | -0.0039(0.0003)  | -0.0240(0.0100)  | -0.0141(0.0035)  | 0.0165(0.0047)   |
| $\nu_{86}(0.1718)$    | 0.0762(0.0985)  | 0.0478(0.0386)  | 0.0280(0.0132)   | 0.0372(0.0234)   | 0.0306(0.0159)   | 0.0535(0.0486)   |
| $\nu_{91}(0.1723)$    | -0.0132(0.0029) | 0.0063(0.0007)  | 0.0260(0.0114)   | 0.0227(0.0087)   | 0.0286(0.0138)   | 0.0126(0.0027)   |
| $\nu_{98}(0.1830)$    | 0.0042(0.0003)  | -0.0021(0.0001) | -0.0069(0.0007)  | -0.0080(0.0010)  | -0.0078(0.0009)  | -0.0057(0.0005)  |
| $\nu_{102}(0.1841)$   | -0.0080(0.0009) | -0.0116(0.0020) | -0.0216(0.0069)  | -0.0208(0.0064)  | -0.0216(0.0069)  | -0.0137(0.0028)  |
| $\nu_{105}(0.1901)$   | 0.0675(0.0630)  | -0.0058(0.0005) | 0.0270(0.0101)   | 0.0338(0.0158)   | 0.0221(0.0068)   | -0.0141(0.0028)  |
| $\nu_{110}(0.2057)$   | 0.2153(0.5478)  | 0.0487(0.0281)  | 0.0778(0.0716)   | 0.0658(0.0511)   | 0.0752(0.0667)   | 0.0305(0.0110)   |
| $\nu_{114}(0.2183)$   | -0.0222(0.0052) | -0.0814(0.0695) | -0.1162(0.1418)  | -0.1411(0.2088)  | -0.1324(0.1838)  | -0.0624(0.0408)  |
| $\nu_{118}(0.3766)$   | 0.0020(0.0001)  | -0.0001(0.0001) | -0.0011(0.0001)  | 0.0024(0.0001)   | -0.0004(0.0001)  | 0.0006(0.0001)   |
| $\nu_{121}(0.3848)$   | -0.0009(0.0001) | -0.0004(0.0001) | -0.0001(0.0001)  | -0.0011(0.0001)  | 0.0001(0.0001)   | -0.0010(0.0001)  |
| $\nu_{126}(0.3890)$   | 0.0009(0.0001)  | -0.0044(0.0001) | -0.0073(0.0002)  | -0.0052(0.0001)  | -0.0077(0.0002)  | -0.0018(0.0001)  |
| $\nu_{128}(0.3984)$   | 0.0024(0.0001)  | -0.0001(0.0001) | 0.0012(0.0001)   | 0.0018(0.0001)   | 0.0020(0.0001)   | -0.0028(0.0001)  |
| $\nu_{132}(0.4005)$   | -0.0044(0.0001) | -0.0026(0.0001) | 0.0005(0.0001)   | 0.0001(0.0001)   | 0.0003(0.0001)   | -0.0035(0.0001)  |

**Table S17:** Linear interstate coupling parameters ( $\lambda$ ) for triplet electronic states of AP4 obtained at B3LYP/6-311G(d,p) level of theory. Coupling strength ( $\lambda^2/2\omega^2$ ) obtained for each vibrational mode is shown in paranthesis.

| Vibrational mode<br>(Freq. eV) | $\lambda_{T_1-T_2}$ | $\lambda_{T_1-T_3}$ | $\lambda_{T_1-T_4}$ | $\lambda_{T_1-T_6}$ | $\lambda_{T_2-T_3}$ | $\lambda_{T_2-T_4}$ | $\lambda_{T_2-T_5}$ | $\lambda_{T_2-T_6}$ | $\lambda_{T_3-T_4}$ | $\lambda_{T_3-T_5}$ | $\lambda_{T_3-T_6}$ | $\lambda_{T_4-T_5}$ | $\lambda_{T_4-T_6}$ | $\lambda_{T_5-T_6}$ |
|--------------------------------|---------------------|---------------------|---------------------|---------------------|---------------------|---------------------|---------------------|---------------------|---------------------|---------------------|---------------------|---------------------|---------------------|---------------------|
| $\nu_1(0.0037)$                | -                   | -                   | -                   | -                   | -                   | -                   | -                   | -                   | -                   | -                   | -                   | -                   | -                   | -                   |
| $\nu_2(0.0050)$                | -                   | -                   | -                   | -                   | -                   | -                   | -                   | -                   | -                   | -                   | -                   | -                   | -                   | -                   |
| $\nu_4(0.0065)$                | -                   | -                   | -                   | -                   | -                   | -                   | -                   | -                   | -                   | -                   | -                   | -                   | -                   | -                   |
| $\nu_5(0.0067)$                | -                   | -                   | -                   | -                   | -                   | -                   | -                   | -                   | -                   | -                   | -                   | -                   | -                   | -                   |
| $\nu_6(0.0070)$                | -                   | -                   | -                   | -                   | -                   | -                   | -                   | -                   | -                   | -                   | -                   | -                   | -                   | -                   |
| $\nu_8(0.0128)$                | -                   | -                   | -                   | -                   | -                   | -                   | -                   | -                   | -                   | -                   | -                   | -                   | -                   | -                   |
| $\nu_9(0.0131)$                | -                   | -                   | -                   | -                   | -                   | -                   | -                   | -                   | -                   | -                   | -                   | -                   | -                   | -                   |
| $\nu_{11}(0.0188)$             | -                   | -                   | -                   | -                   | -                   | -                   | -                   | -                   | -                   | -                   | -                   | -                   | -                   | -                   |
| $\nu_{12}(0.0190)$             | -                   | -                   | -                   | -                   | -                   | -                   | -                   | -                   | -                   | -                   | -                   | -                   | -                   | -                   |
| $\nu_{13}(0.0207)$             | -                   | -                   | -                   | -                   | -                   | -                   | -                   | -                   | -                   | -                   | -                   | -                   | -                   | -                   |
| $\nu_{14}(0.0207)$             | -                   | -                   | -                   | -                   | -                   | -                   | -                   | -                   | -                   | -                   | -                   | -                   | -                   | -                   |
| $\nu_{16}(0.0217)$             | -                   | -                   | -                   | -                   | -                   | -                   | -                   | -                   | -                   | -                   | -                   | -                   | -                   | -                   |
| $\nu_{17}(0.0242)$             | -                   | -                   | -                   | -                   | -                   | -                   | -                   | -                   | -                   | -                   | -                   | -                   | -                   | -                   |
| $\nu_{18}(0.0260)$             | -                   | -                   | -                   | -                   | -                   | -                   | -                   | -                   | -                   | -                   | -                   | -                   | -                   | -                   |
| $\nu_{19}(0.0299)$             | -                   | -                   | -                   | -                   | -                   | -                   | -                   | -                   | -                   | -                   | -                   | -                   | -                   | -                   |
| $\nu_{21}(0.0343)$             | -                   | -                   | -                   | -                   | -                   | -                   | -                   | -                   | -                   | -                   | -                   | -                   | -                   | -                   |
| $\nu_{23}(0.0378)$             | -                   | -                   | -                   | -                   | -                   | -                   | -                   | -                   | -                   | -                   | -                   | -                   | -                   | -                   |
| $\nu_{24}(0.0393)$             | -                   | -                   | -                   | -                   | -                   | -                   | -                   | -                   | -                   | -                   | -                   | -                   | -                   | -                   |
| $\nu_{25}(0.0410)$             | -                   | -                   | -                   | -                   | -                   | -                   | -                   | -                   | -                   | -                   | -                   | -                   | -                   | -                   |
| $\nu_{26}(0.0432)$             | -                   | -                   | -                   | -                   | -                   | -                   | -                   | -                   | -                   | -                   | -                   | -                   | -                   | -                   |
| $\nu_{27}(0.0471)$             | -                   | -                   | -                   | -                   | -                   | -                   | -                   | -                   | -                   | -                   | -                   | -                   | -                   | -                   |
| $\nu_{28}(0.0472)$             | -                   | -                   | -                   | -                   | -                   | -                   | -                   | -                   | -                   | -                   | -                   | -                   | -                   | -                   |
| $\nu_{30}(0.0574)$             | -                   | -                   | -                   | -                   | -                   | -                   | -                   | -                   | -                   | -                   | -                   | -                   | -                   | -                   |
| $\nu_{31}(0.0609)$             | -                   | -                   | -                   | -                   | -                   | -                   | -                   | -                   | -                   | -                   | -                   | -                   | -                   | -                   |
| $\nu_{33}(0.0632)$             | -                   | -                   | -                   | -                   | -                   | -                   | -                   | -                   | -                   | -                   | -                   | -                   | -                   | -                   |
| $\nu_{34}(0.0652)$             | -                   | -                   | -                   | -                   | -                   | -                   | -                   | -                   | -                   | -                   | -                   | -                   | -                   | -                   |
| $\nu_{35}(0.0658)$             | -                   | -                   | -                   | -                   | -                   | -                   | -                   | -                   | -                   | -                   | -                   | -                   | -                   | -                   |
| $\nu_{36}(0.0673)$             | -                   | -                   | -                   | -                   | -                   | -                   | -                   | -                   | -                   | -                   | -                   | -                   | -                   | -                   |
| $\nu_{38}(0.0712)$             | -                   | -                   | -                   | -                   | -                   | -                   | -                   | -                   | -                   | -                   | -                   | -                   | -                   | -                   |
| $\nu_{39}(0.0731)$             | -                   | -                   | -                   | -                   | -                   | -                   | -                   | -                   | -                   | -                   | -                   | -                   | -                   | -                   |
| $\nu_{41}(0.0759)$             | -                   | -                   | -                   | -                   | -                   | -                   | -                   | -                   | -                   | -                   | -                   | -                   | -                   | -                   |
| $\nu_{42}(0.0764)$             | -                   | -                   | -                   | -                   | -                   | -                   | -                   | -                   | -                   | -                   | -                   | -                   | -                   | -                   |
| $\nu_{43}(0.0813)$             | -                   | -                   | -                   | -                   | -                   | -                   | -                   | -                   | -                   | -                   | -                   | -                   | -                   | -                   |
| $\nu_{44}(0.0817)$             | -                   | -                   | -                   | -                   | -                   | -                   | -                   | -                   | -                   | -                   | -                   | -                   | -                   | -                   |
| $\nu_{46}(0.0842)$             | -                   | -                   | -                   | -                   | -                   | -                   | -                   | -                   | -                   | -                   | -                   | -                   | -                   | -                   |
| $\nu_{48}(0.0881)$             | -                   | -                   | -                   | -                   | -                   | -                   | -                   | -                   | -                   | -                   | -                   | -                   | -                   | -                   |
| $\nu_{49}(0.0883)$             | -                   | -                   | -                   | -                   | -                   | -                   | -                   | -                   | -                   | -                   | -                   | -                   | -                   | -                   |
| $\nu_{50}(0.0909)$             | -                   | -                   | -                   | -                   | -                   | -                   | -                   | -                   | -                   | -                   | -                   | -                   | -                   | -                   |
| $\nu_{51}(0.0910)$             | -                   | -                   | -                   | -                   | -                   | -                   | -                   | -                   | -                   | -                   | -                   | -                   | -                   | -                   |
| $\nu_{52}(0.0943)$             | -                   | -                   | -                   | -                   | -                   | -                   | -                   | -                   | -                   | -                   | -                   | -                   | -                   | -                   |
| $\nu_{53}(0.1013)$             | -                   | -                   | -                   | -                   | -                   | -                   | -                   | -                   | -                   | -                   | -                   | -                   | -                   | -                   |
| $\nu_{54}(0.1032)$             | -                   | -                   | -                   | -                   | -                   | -                   | -                   | -                   | -                   | -                   | -                   | -                   | -                   | -                   |
| $\nu_{56}(0.1046)$             | -                   | -                   | -                   | -                   | -                   | -                   | -                   | -                   | -                   | -                   | -                   | -                   | -                   | -                   |
| $\nu_{57}(0.1098)$             | -                   | -                   | -                   | -                   | -                   | -                   | -                   | -                   | -                   | -                   | -                   | -                   | -                   | -                   |
| $\nu_{59}(0.1174)$             | -                   | -                   | -                   | -                   | -                   | -                   | -                   | -                   | -                   | -                   | -                   | -                   | -                   | -                   |
| $\nu_{60}(0.1194)$             | -                   | -                   | -                   | -                   | -                   | -                   | -                   | -                   | -                   | -                   | -                   | -                   | -                   | -                   |
| $\nu_{61}(0.1210)$             | -                   | -                   | -                   | -                   | -                   | -                   | -                   | -                   | -                   | -                   | -                   | -                   | -                   | -                   |
| $\nu_{63}(0.1228)$             | -                   | -                   | -                   | -                   | -                   | -                   | -                   | -                   | -                   | -                   | -                   | -                   | -                   | -                   |
| $\nu_{64}(0.1230)$             | -                   | -                   | -                   | -                   | -                   | -                   | -                   | -                   | -                   | -                   | -                   | -                   | -                   | -                   |
| $\nu_{65}(0.1240)$             | -                   | -                   | -                   | -                   | -                   | -                   | -                   | -                   | -                   | -                   | -                   | -                   | -                   | -                   |
| $\nu_{66}(0.1249)$             | -                   | -                   | -                   | -                   | -                   | -                   | -                   | -                   | -                   | -                   | -                   | -                   | -                   | -                   |
| $\nu_{67}(0.1282)$             | -                   | -                   | -                   | -                   | -                   | -                   | -                   | -                   | -                   | -                   | -                   | -                   | -                   | -                   |
| $\nu_{68}(0.1283)$             | -                   | -                   | -                   | -                   | -                   | -                   | -                   | -                   | -                   | -                   | -                   | -                   | -                   | -                   |
| $\nu_{70}(0.1287)$             | -                   | -                   | -                   | -                   | -                   | -                   | -                   | -                   | -                   | -                   | -                   | -                   | -                   | -                   |
| $\nu_{71}(0.1289)$             | -                   | -                   | -                   | -                   | -                   | -                   | -                   | -                   | -                   | -                   | -                   | -                   | -                   | -                   |
| $\nu_{72}(0.1339)$             | -                   | -                   | -                   | -                   | -                   | -                   | -                   | -                   | -                   | -                   | -                   | -                   | -                   | -                   |
| $\nu_{74}(0.1412)$             | -                   | -                   | -                   | -                   | -                   | -                   | -                   | -                   | -                   | -                   | -                   | -                   | -                   | -                   |
| $\nu_{75}(0.1489)$             | -                   | -                   | -                   | -                   | -                   | -                   | -                   | -                   | -                   | -                   | -                   | -                   | -                   | -                   |
| $\nu_{76}(0.1492)$             | -                   | -                   | -                   | -                   | -                   | -                   | -                   | -                   | -                   | -                   | -                   | -                   | -                   | -                   |
| $\nu_{78}(0.1506)$             | -                   | -                   | -                   | -                   | -                   | -                   | -                   | -                   | -                   | -                   | -                   | -                   | -                   | -                   |
| $\nu_{79}(0.1508)$             | -                   | -                   | -                   | -                   | -                   | -                   | -                   | -                   | -                   | -                   | -                   | -                   | -                   | -                   |
| $\nu_{80}(0.1544)$             | -                   | -                   | -                   | -                   | -                   | -                   | -                   | -                   | -                   | -                   | -                   | -                   | -                   | -                   |



**Fig. S2:** Adiabatic potential energy curves of singlet electronic states along the dimensionless normal coordinates of C=C stretch vibration ( $Q_{51}$ ) for **P**, C=O stretch vibration ( $Q_{88}$ ) for **AP2** and C=O stretch vibration ( $Q_{114}$ ) for **AP4**. Computed energies (plus harmonic potential) are shown by the asterisks on each curve.

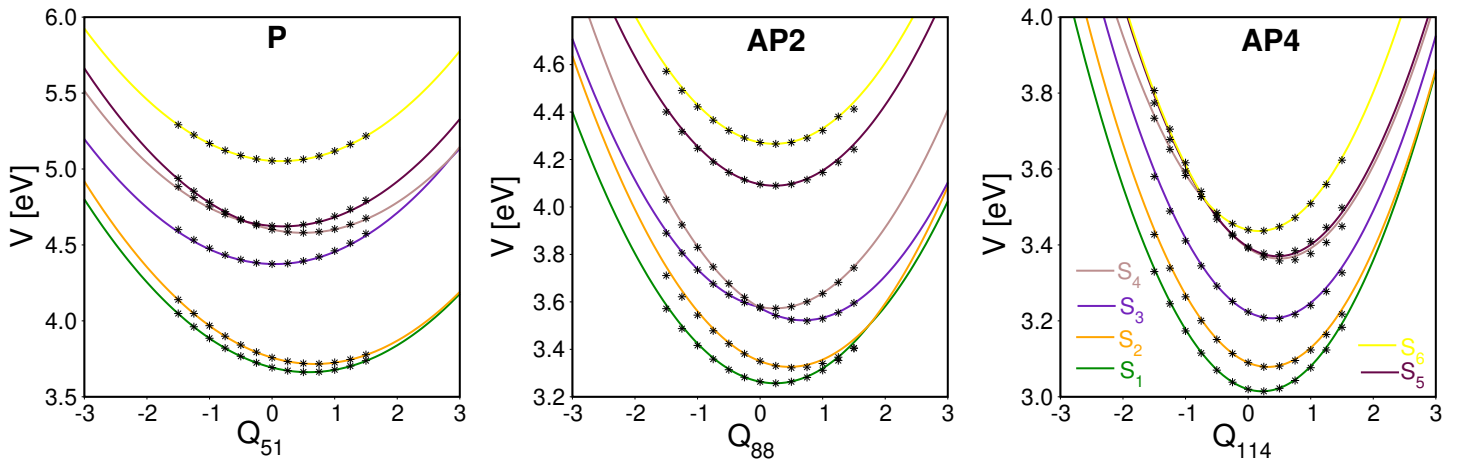

**Fig. S3:** Potential energy surfaces of triplet manifold and  $S_1$  along the dimensionless normal coordinates of C=C stretch vibration ( $Q_{86}$ ) and C=O stretch vibration ( $Q_{88}$ ) of **AP2**.

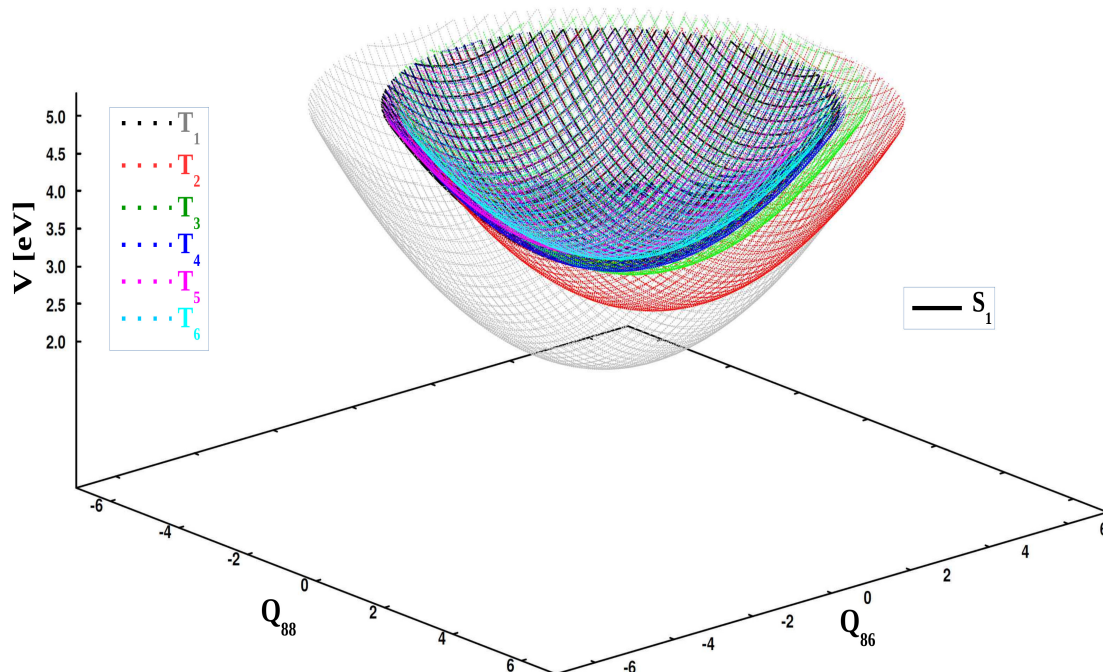

**Fig. S4:** Potential energy surfaces of triplet manifold and  $S_1$  along the dimensionless normal coordinates of C=C stretch vibration ( $Q_{105}$ ) and C=O stretch vibration ( $Q_{114}$ ) of **AP4**.

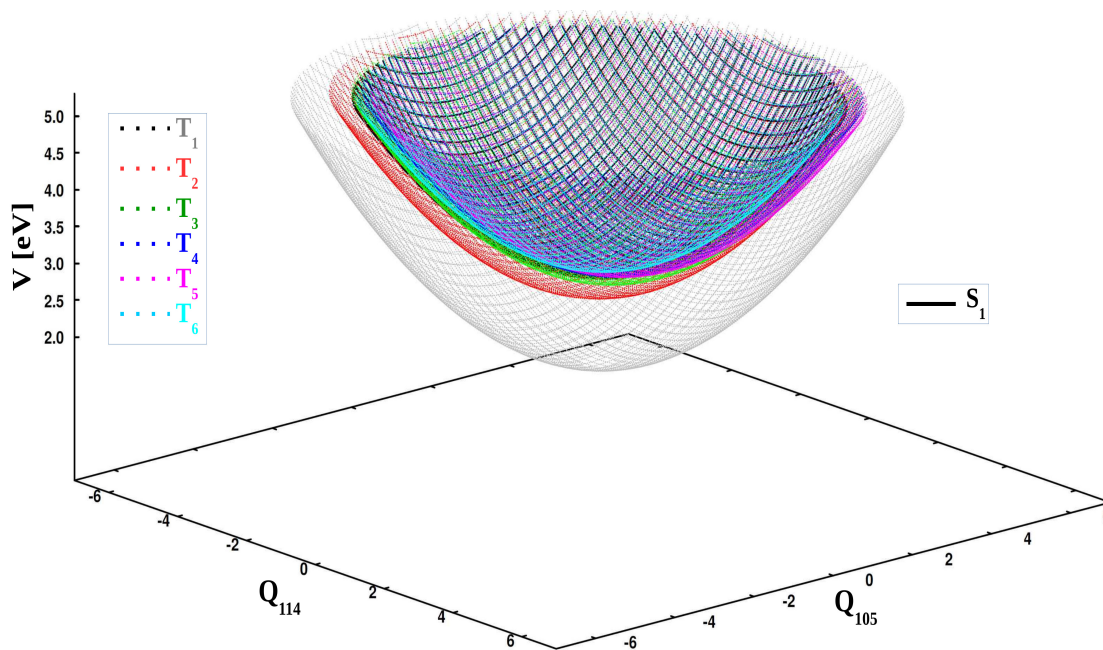

**Fig. S5:** Electronic population decay profiles of singlet manifold of **P**, **AP2** and **AP4**. The initial MCTDH wavepacket is placed on the FC point of individual electronic state of respective molecule and its time-evolution is monitored.

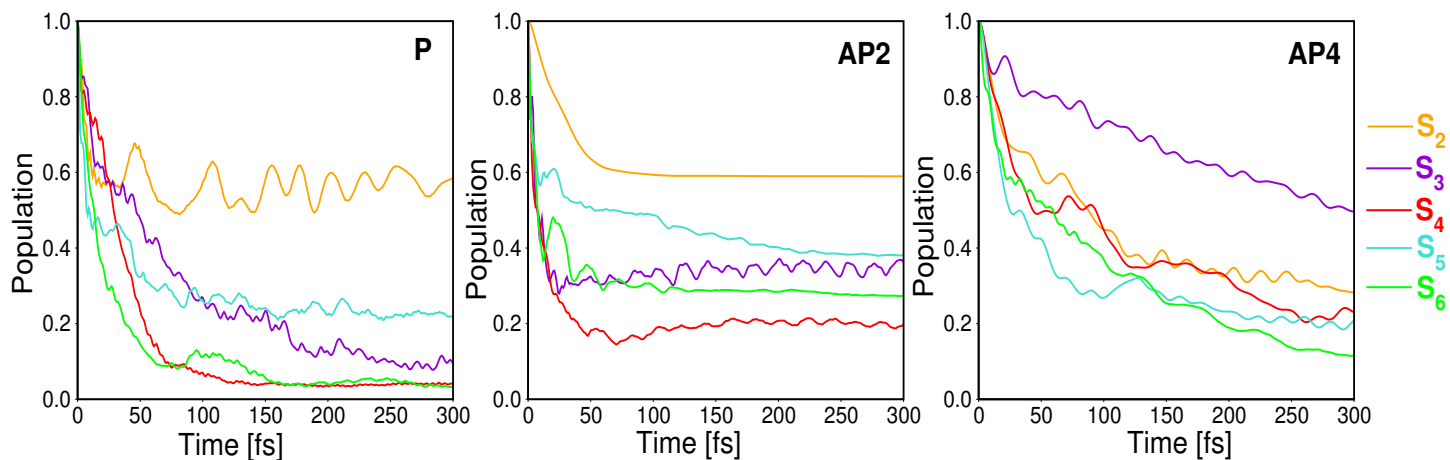

**Fig. S6:** Initial electronic population decay profile of  $S_2$  state of **P**. The initial MCTDH wavepacket is placed on the FC point of  $S_2$  electronic state and its time-evolution is monitored. The  $S_2$  state lifetime is calculated by fitting the initial electronic population (shown in black) to a simple monoexponential function.

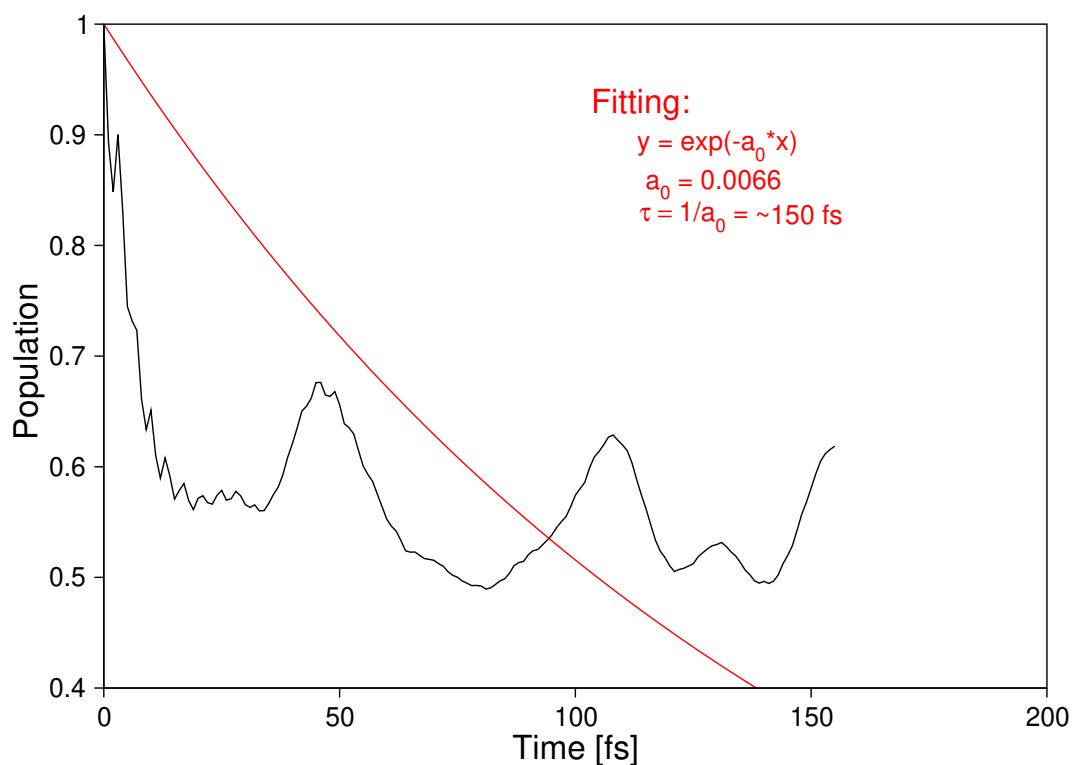

**Table S18:** MCTDH details of normal mode combination, primitive basis and single particle basis used in the S<sub>1</sub>-S<sub>6</sub> dynamics and T<sub>1</sub>-T<sub>4</sub> / T<sub>1</sub>-T<sub>5</sub> dynamics of **P**, **AP2** and **AP4**.

| <b>Singlets</b> |                                                   |                        |                  |
|-----------------|---------------------------------------------------|------------------------|------------------|
|                 | <b>Normal modes</b>                               | <b>Primitive basis</b> | <b>SPF basis</b> |
| <b>P</b>        | $(\nu_3, \nu_{11}, \nu_{16}, \nu_{23}, \nu_{26})$ | (7,9,7,5,4)            | [4,4,4,4,7,4]    |
|                 | $(\nu_1, \nu_9, \nu_{13}, \nu_{19}, \nu_{27})$    | (10,9,6,8,4)           | [7,4,5,5,10,6]   |
|                 | $(\nu_4, \nu_7, \nu_{15}, \nu_{24}, \nu_{29})$    | (5,7,7,7,6)            | [4,4,4,4,7,5]    |
|                 | $(\nu_2, \nu_8, \nu_{18}, \nu_{21}, \nu_{30})$    | (6,7,8,4,7)            | [6,7,4,6,4,4]    |
|                 | $(\nu_6, \nu_{12}, \nu_{14}, \nu_{20}, \nu_{28})$ | (7,8,6,4,4)            | [7,6,4,5,5,6]    |
|                 | $(\nu_5, \nu_{10}, \nu_{17}, \nu_{22}, \nu_{25})$ | (6,6,6,6,5)            | [4,4,6,4,4,4]    |
| <b>AP2</b>      | $(\nu_3, \nu_{10}, \nu_{14}, \nu_{21}, \nu_{28})$ | (7,7,8,7,6)            | [4,5,6,4,4,4]    |
|                 | $(\nu_4, \nu_{11}, \nu_{16}, \nu_{23}, \nu_{27})$ | (6,10,9,9,7)           | [4,4,4,4,5,5]    |
|                 | $(\nu_1, \nu_2, \nu_{26}, \nu_{22})$              | (10,9,6,8)             | [8,9,10,9,8,7]   |
|                 | $(\nu_8, \nu_{12}, \nu_{17}, \nu_{30})$           | (7,10,9,7)             | [5,5,5,5,4,4]    |
|                 | $(\nu_5, \nu_{15}, \nu_{19}, \nu_{20})$           | (5,9,8,7)              | [4,4,4,4,5,5]    |
|                 | $(\nu_9, \nu_{13}, \nu_{18}, \nu_{24})$           | (8,9,8,8)              | [5,4,4,4,5,5]    |
|                 | $(\nu_6, \nu_7, \nu_{25}, \nu_{29})$              | (6,6,6,7)              | [4,4,4,4,5,5]    |
| <b>AP4</b>      | $(\nu_3, \nu_{11}, \nu_{16}, \nu_{23}, \nu_{26})$ | (6,9,6,7,5)            | [4,5,5,5,5,5]    |
|                 | $(\nu_1, \nu_9, \nu_{13}, \nu_{19}, \nu_{27})$    | (10,6,4,8,9)           | [7,8,10,10,10,9] |
|                 | $(\nu_4, \nu_7, \nu_{15}, \nu_{24}, \nu_{29})$    | (5,6,7,6,5)            | [5,6,6,6,6,5]    |
|                 | $(\nu_2, \nu_8, \nu_{18}, \nu_{21}, \nu_{30})$    | (7,6,6,5,5)            | [7,4,7,4,4,4]    |
|                 | $(\nu_6, \nu_{12}, \nu_{14}, \nu_{20}, \nu_{28})$ | (4,5,7,9,9)            | [4,4,4,4,4,4]    |
|                 | $(\nu_5, \nu_{10}, \nu_{17}, \nu_{22}, \nu_{25})$ | (5,9,6,5,5)            | [5,4,4,4,4,4]    |
| <b>Triples</b>  |                                                   |                        |                  |
| <b>P</b>        | $(\nu_1, \nu_{11}, \nu_{14}, \nu_{21}, \nu_{30})$ | (9,4,4,7,8)            | [8,4,4,7]        |
|                 | $(\nu_2, \nu_8, \nu_{16}, \nu_{23}, \nu_{28})$    | (6,5,5,6,5)            | [4,5,6,6]        |
|                 | $(\nu_3, \nu_7, \nu_9, \nu_{22}, \nu_{25})$       | (5,7,10,5,5)           | [9,6,9,7]        |
|                 | $(\nu_4, \nu_{12}, \nu_{13}, \nu_{17}, \nu_{27})$ | (7,4,4,4,4)            | [5,4,6,4]        |
|                 | $(\nu_6, \nu_{15}, \nu_{19}, \nu_{20}, \nu_{26})$ | (5,4,5,5,5)            | [4,4,5,4]        |
|                 | $(\nu_5, \nu_{10}, \nu_{18}, \nu_{24}, \nu_{29})$ | (8,4,7,7,4)            | [8,6,4,6]        |
| <b>AP2</b>      | $(\nu_3, \nu_8, \nu_{14}, \nu_{21}, \nu_{28})$    | (4,5,10,5,4)           | [4,4,4,5]        |
|                 | $(\nu_4, \nu_{11}, \nu_{16}, \nu_{23}, \nu_{27})$ | (5,8,8,6,5)            | [7,5,6,6]        |
|                 | $(\nu_1, \nu_7, \nu_{10}, \nu_{26}, \nu_{22})$    | (10,4,6,6,7)           | [8,9,10,10]      |
|                 | $(\nu_2, \nu_6, \nu_{12}, \nu_{17}, \nu_{30})$    | (9,6,7,9,7)            | [7,7,8,8]        |
|                 | $(\nu_5, \nu_{15}, \nu_{19}, \nu_{20}, \nu_{25})$ | (6,9,9,6,5)            | [6,4,4,4]        |
|                 | $(\nu_9, \nu_{13}, \nu_{18}, \nu_{24}, \nu_{29})$ | (5,10,8,6,6)           | [4,4,5,4]        |
|                 | $(\nu_3, \nu_{11}, \nu_{16}, \nu_{23}, \nu_{26})$ | (5,8,4,5,4)            | [5,4,4,4,4,]     |
| <b>AP4</b>      | $(\nu_1, \nu_9, \nu_{13}, \nu_{19}, \nu_{27})$    | (10,9,6,8,7)           | [8,9,9,9,10]     |
|                 | $(\nu_4, \nu_7, \nu_{15}, \nu_{24}, \nu_{29})$    | (5,6,6,9,4)            | [4,5,6,6,7]      |
|                 | $(\nu_2, \nu_8, \nu_{18}, \nu_{21}, \nu_{30})$    | (5,7,8,7,5)            | [4,4,5,4,4]      |
|                 | $(\nu_6, \nu_{12}, \nu_{14}, \nu_{20}, \nu_{28})$ | (7,4,7,7,4)            | [7,4,4,4,4]      |
|                 | $(\nu_5, \nu_{10}, \nu_{17}, \nu_{22}, \nu_{25})$ | (7,7,8,6,9)            | [7,6,5,5,5]      |
